# Supplementary material for: Chlorogenic Acids, Acting via Calcineurin, Are the Main Compounds in Centella asiatica Extracts That Mediate Resilience to Chronic Stress in Drosophila melanogaster
Source: Nutrients. 2023 Sep 16;15(18):4016. doi: 10.3390/nu15184016 (PMC10537055; doi:10.3390/nu15184016)
Supplement: Supplementary file 1 [file nutrients-15-04016-s001.zip]

Archive with 10 entries (10 files):
- Holvoet et al Supplementary Figure S1.pdf
- Statistics_Figure2.xlsx
- Statistics_Figure3.xlsx
- Statistics_Figure4.xlsx
- Statistics_Figure5.xlsx
- Statistics_Figure6.xlsx
- Statistics_Figure7.xlsx
- Statistics_Figure8.xlsx
- Statistics_Figure9.xlsx
- Statistics_FigureS1.xlsx
