# Supplementary material for: Chlorogenic Acids, Acting via Calcineurin, Are the Main Compounds in Centella asiatica Extracts That Mediate Resilience to Chronic Stress in Drosophila melanogaster
Source: Nutrients. 2023 Sep 16;15(18):4016. doi: 10.3390/nu15184016 (PMC10537055; doi:10.3390/nu15184016)
Supplement: Supplementary file 1 [file nutrients-15-04016-s001.zip › Statistics_Figure2.xlsx]

## Sheet: Statistics_Fig2B
> args <- commandArgs(TRUE)
> options(warn=-1)
> data <- read.csv2(file.choose())
> cn<-colnames(data)
> min1<-min(data [,1][!is.na(data [,1])])
> min2<-min(data [,2][!is.na(data [,2])])
> min3<-min(data [,3][!is.na(data [,3])])
> min4<-min(data [,4][!is.na(data [,4])])
> min5<-min(data [,5][!is.na(data [,5])])
> min6<-min(data [,6][!is.na(data [,6])])
> miny=min(min1,min2,min3,min4,min5,min6)
> max1<-max(data [,1][!is.na(data [,1])])
> max2<-max(data [,2][!is.na(data [,2])])
> max3<-max(data [,3][!is.na(data [,3])])
> max4<-max(data [,4][!is.na(data [,4])])
> max5<-max(data [,5][!is.na(data [,5])])
> max6<-max(data [,6][!is.na(data [,6])])
> maxy=max(max1,max2,max3,max4,max5,max6)
> deltay<-(maxy-miny)
> print("Shapiro-Wilk-Test:")
[1] "Shapiro-Wilk-Test:"
> ps_1 <- shapiro.test(data [,1])$p.value
> ps_1
[1] 0.0001207269
> ps_2 <- shapiro.test(data [,2])$p.value
> ps_2
[1] 0.04802627
> ps_3 <- shapiro.test(data [,3])$p.value
> ps_3
[1] 0.0002462412
> ps_4 <- shapiro.test(data [,4])$p.value
> ps_4
[1] 0.09215387
> ps_5 <- shapiro.test(data [,5])$p.value
> ps_5
[1] 0.0001251492
> ps_6 <- shapiro.test(data [,6])$p.value
> ps_6
[1] 0.01155725
> data2 <- tidyr::gather(data,"Typ","Wert",na.rm=TRUE)
> kruskal.test(data2$Wert, data2$Typ)
Kruskal-Wallis rank sum test
data: data2$Wert and data2$Typ
Kruskal-Wallis chi-squared = 48.493, df = 5, p-value = 2.817e-09
> print("none")
[1] "none"
> pwt <- pairwise.wilcox.test(data2$Wert, data2$Typ, p.adjust.method="none")$p.value
> pwt
cont..centella.PT cont..centella.T1 control.PT control.T1 proph..centella.PT
cont..centella.T1 6.778731e-03 NA NA NA NA
control.PT 7.065350e-01 0.0137096340 NA NA NA
control.T1 2.212452e-07 0.0001129489 3.236559e-07 NA NA
proph..centella.PT 9.313105e-01 0.0079318366 6.739057e-01 3.401836e-07 NA
proph..centella.T1 2.990358e-02 0.9455567795 4.818460e-02 3.579127e-04 0.02887465
> print("Holm:")
[1] "Holm:"
> pwt <- pairwise.wilcox.test(data2$Wert, data2$Typ, p.adjust.method="holm")$p.value
> pwt
cont..centella.PT cont..centella.T1 control.PT control.T1 proph..centella.PT
cont..centella.T1 6.778731e-02 NA NA NA NA
control.PT 1.000000e+00 0.109677072 NA NA NA
control.T1 3.318679e-06 0.001355387 4.531183e-06 NA NA
proph..centella.PT 1.000000e+00 0.071386529 1.000000e+00 4.531183e-06 NA
proph..centella.T1 2.021225e-01 1.000000000 2.409230e-01 3.937040e-03 0.2021225

## Sheet: Statistics_Fig2C
> args <- commandArgs(TRUE)
> options(warn=-1)
> data <- read.csv2(file.choose())
> cn<-colnames(data)
> min1<-min(data [,1][!is.na(data [,1])])
> min2<-min(data [,2][!is.na(data [,2])])
> min3<-min(data [,3][!is.na(data [,3])])
> min4<-min(data [,4][!is.na(data [,4])])
> miny=min(min1,min2,min3,min4)
> max1<-max(data [,1][!is.na(data [,1])])
> max2<-max(data [,2][!is.na(data [,2])])
> max3<-max(data [,3][!is.na(data [,3])])
> max4<-max(data [,4][!is.na(data [,4])])
> maxy=max(max1,max2,max3,max4)
> deltay<-(maxy-miny)
> print("Shapiro-Wilk-Test:")
[1] "Shapiro-Wilk-Test:"
> ps_1 <- shapiro.test(data [,1])$p.value
> ps_1
[1] 0.06690609
> ps_2 <- shapiro.test(data [,2])$p.value
> ps_2
[1] 0.321715
> ps_3 <- shapiro.test(data [,3])$p.value
> ps_3
[1] 0.6530227
> ps_4 <- shapiro.test(data [,4])$p.value
> ps_4
[1] 0.06878216
> data2 <- tidyr::gather(data,"Typ","Wert",na.rm=TRUE)
> kruskal.test(data2$Wert, data2$Typ)
Kruskal-Wallis rank sum test
data: data2$Wert and data2$Typ
Kruskal-Wallis chi-squared = 14.112, df = 3, p-value = 0.002756
> print("none")
[1] "none"
> pwt <- pairwise.wilcox.test(data2$Wert, data2$Typ, p.adjust.method="none")$p.value
> pwt
centella.cont. centella.proph. CS.ctrl.
centella.proph. 0.596455933 NA NA
CS.ctrl. 0.009764063 0.005706978 NA
ctrl.novib 0.170734745 0.483039869 0.001067252
> print("Holm:")
[1] "Holm:"
> pwt <- pairwise.wilcox.test(data2$Wert, data2$Typ, p.adjust.method="holm")$p.value
> pwt
centella.cont. centella.proph. CS.ctrl.
centella.proph. 0.96607974 NA NA
CS.ctrl. 0.03905625 0.02853489 NA
ctrl.novib 0.51220424 0.96607974 0.006403515

## Sheet: Statistics_Fig2D
> args <- commandArgs(TRUE)
> options(warn=-1)
> data <- read.csv2(file.choose())
> cn<-colnames(data)
> min1<-min(data [,1][!is.na(data [,1])])
> min2<-min(data [,2][!is.na(data [,2])])
> min3<-min(data [,3][!is.na(data [,3])])
> min4<-min(data [,4][!is.na(data [,4])])
> min5<-min(data [,5][!is.na(data [,5])])
> min6<-min(data [,6][!is.na(data [,6])])
> miny=min(min1,min2,min3,min4,min5,min6)
> max1<-max(data [,1][!is.na(data [,1])])
> max2<-max(data [,2][!is.na(data [,2])])
> max3<-max(data [,3][!is.na(data [,3])])
> max4<-max(data [,4][!is.na(data [,4])])
> max5<-max(data [,5][!is.na(data [,5])])
> max6<-max(data [,6][!is.na(data [,6])])
> maxy=max(max1,max2,max3,max4,max5,max6)
> deltay<-(maxy-miny)
> print("Shapiro-Wilk-Test:")
[1] "Shapiro-Wilk-Test:"
> ps_1 <- shapiro.test(data [,1])$p.value
> ps_1
[1] 1.765175e-05
> ps_2 <- shapiro.test(data [,2])$p.value
> ps_2
[1] 0.3597766
> ps_3 <- shapiro.test(data [,3])$p.value
> ps_3
[1] 0.0003405819
> ps_4 <- shapiro.test(data [,4])$p.value
> ps_4
[1] 0.07956772
> ps_5 <- shapiro.test(data [,5])$p.value
> ps_5
[1] 4.526571e-05
> ps_6 <- shapiro.test(data [,6])$p.value
> ps_6
[1] 0.09750941
> data2 <- tidyr::gather(data,"Typ","Wert",na.rm=TRUE)
> kruskal.test(data2$Wert, data2$Typ)
Kruskal-Wallis rank sum test
data: data2$Wert and data2$Typ
Kruskal-Wallis chi-squared = 56.422, df = 5, p-value = 6.654e-11
> print("none")
[1] "none"
> pwt <- pairwise.wilcox.test(data2$Wert, data2$Typ, p.adjust.method="none")$p.value
> pwt
cont..centella.PT cont..centella.T1 control.PT control.T1 proph..centella.PT
cont..centella.T1 2.671318e-03 NA NA NA NA
control.PT 5.192395e-01 0.0065380166 NA NA NA
control.T1 1.455482e-06 0.0019219124 1.869406e-06 NA NA
proph..centella.PT 5.533716e-01 0.0009188757 1.713559e-01 7.365380e-07 NA
proph..centella.T1 4.840762e-05 0.1131233990 9.074824e-05 4.930866e-02 1.99616e-05
> print("Holm:")
[1] "Holm:"
> pwt <- pairwise.wilcox.test(data2$Wert, data2$Typ, p.adjust.method="holm")$p.value
> pwt
cont..centella.PT cont..centella.T1 control.PT control.T1 proph..centella.PT
cont..centella.T1 1.869922e-02 NA NA NA NA
control.PT 1.000000e+00 0.039228099 NA NA NA
control.T1 2.037675e-05 0.015375299 2.430228e-05 NA NA
proph..centella.PT 1.000000e+00 0.008269881 5.140678e-01 1.104807e-05 NA
proph..centella.T1 5.324838e-04 0.452493596 9.074824e-04 2.465433e-01 0.0002395392

## Sheet: Statistics_Fig2E
> args <- commandArgs(TRUE)
> options(warn=-1)
> data <- read.csv2(file.choose())
> cn<-colnames(data)
> min1<-min(data [,1][!is.na(data [,1])])
> min2<-min(data [,2][!is.na(data [,2])])
> min3<-min(data [,3][!is.na(data [,3])])
> min4<-min(data [,4][!is.na(data [,4])])
> miny=min(min1,min2,min3,min4)
> max1<-max(data [,1][!is.na(data [,1])])
> max2<-max(data [,2][!is.na(data [,2])])
> max3<-max(data [,3][!is.na(data [,3])])
> max4<-max(data [,4][!is.na(data [,4])])
> maxy=max(max1,max2,max3,max4)
> deltay<-(maxy-miny)
> print("Shapiro-Wilk-Test:")
[1] "Shapiro-Wilk-Test:"
> ps_1 <- shapiro.test(data [,1])$p.value
> ps_1
[1] 0.2061222
> ps_2 <- shapiro.test(data [,2])$p.value
> ps_2
[1] 0.185302
> ps_3 <- shapiro.test(data [,3])$p.value
> ps_3
[1] 0.1866268
> ps_4 <- shapiro.test(data [,4])$p.value
> ps_4
[1] 0.04755
> data2 <- tidyr::gather(data,"Typ","Wert",na.rm=TRUE)
> kruskal.test(data2$Wert, data2$Typ)
Kruskal-Wallis rank sum test
data: data2$Wert and data2$Typ
Kruskal-Wallis chi-squared = 12.494, df = 3, p-value = 0.005869
> print("none")
[1] "none"
> pwt <- pairwise.wilcox.test(data2$Wert, data2$Typ, p.adjust.method="none")$p.value
> pwt
centella.cont. centella.proph. CS.ctrl.
centella.proph. 0.31293796 NA NA
CS.ctrl. 0.05409267 0.1910470 NA
ctrl.novib 0.39148300 0.0139234 0.0006063038
> print("Holm:")
[1] "Holm:"
> pwt <- pairwise.wilcox.test(data2$Wert, data2$Typ, p.adjust.method="holm")$p.value
> pwt
centella.cont. centella.proph. CS.ctrl.
centella.proph. 0.6258759 NA NA
CS.ctrl. 0.2163707 0.57314093 NA
ctrl.novib 0.6258759 0.04796170 0.003637823
