# Supplementary material for: Chlorogenic Acids, Acting via Calcineurin, Are the Main Compounds in Centella asiatica Extracts That Mediate Resilience to Chronic Stress in Drosophila melanogaster
Source: Nutrients. 2023 Sep 16;15(18):4016. doi: 10.3390/nu15184016 (PMC10537055; doi:10.3390/nu15184016)
Supplement: Supplementary file 1 [file nutrients-15-04016-s001.zip › Statistics_Figure3.xlsx]

## Sheet: Statistics_Fig3B
> args <- commandArgs(TRUE)
> options(warn=-1)
> data <- read.csv2(file.choose())
> cn<-colnames(data)
> min1<-min(data [,1][!is.na(data [,1])])
> min2<-min(data [,2][!is.na(data [,2])])
> min3<-min(data [,3][!is.na(data [,3])])
> min4<-min(data [,4][!is.na(data [,4])])
> min5<-min(data [,5][!is.na(data [,5])])
> min6<-min(data [,6][!is.na(data [,6])])
> miny=min(min1,min2,min3,min4,min5,min6)
> max1<-max(data [,1][!is.na(data [,1])])
> max2<-max(data [,2][!is.na(data [,2])])
> max3<-max(data [,3][!is.na(data [,3])])
> max4<-max(data [,4][!is.na(data [,4])])
> max5<-max(data [,5][!is.na(data [,5])])
> max6<-max(data [,6][!is.na(data [,6])])
> maxy=max(max1,max2,max3,max4,max5,max6)
> deltay<-(maxy-miny)
> print("Shapiro-Wilk-Test:")
[1] "Shapiro-Wilk-Test:"
> ps_1 <- shapiro.test(data [,1])$p.value
> ps_1
[1] 9.618154e-07
> ps_2 <- shapiro.test(data [,2])$p.value
> ps_2
[1] 0.002228266
> ps_3 <- shapiro.test(data [,3])$p.value
> ps_3
[1] 0.0006875356
> ps_4 <- shapiro.test(data [,4])$p.value
> ps_4
[1] 0.06184609
> ps_5 <- shapiro.test(data [,5])$p.value
> ps_5
[1] 0.000308521
> ps_6 <- shapiro.test(data [,6])$p.value
> ps_6
[1] 0.01292126
> data2 <- tidyr::gather(data,"Typ","Wert",na.rm=TRUE)
> kruskal.test(data2$Wert, data2$Typ)
Kruskal-Wallis rank sum test
data: data2$Wert and data2$Typ
Kruskal-Wallis chi-squared = 73.047, df = 5, p-value = 2.377e-14
> print("none")
[1] "none"
> pwt <- pairwise.wilcox.test(data2$Wert, data2$Typ, p.adjust.method="none")$p.value
> pwt
CQA.cont..PT CQA.cont..T1 CQA.proph..PT CQA.proph..T1 X10..EtOH.cont..PT
CQA.cont..T1 7.786202e-01 NA NA NA NA
CQA.proph..PT 4.612637e-01 3.339463e-01 NA NA NA
CQA.proph..T1 6.222533e-01 8.279757e-01 2.651335e-01 NA NA
X10..EtOH.cont..PT 6.533580e-01 9.410879e-01 1.778446e-01 9.065900e-01 NA
X10..EtOH.cont..T1 7.221565e-09 3.881573e-08 3.599079e-09 6.839287e-07 2.818946e-12
> print("Holm:")
[1] "Holm:"
> pwt <- pairwise.wilcox.test(data2$Wert, data2$Typ, p.adjust.method="holm")$p.value
> pwt
CQA.cont..PT CQA.cont..T1 CQA.proph..PT CQA.proph..T1 X10..EtOH.cont..PT
CQA.cont..T1 1.000000e+00 NA NA NA NA
CQA.proph..PT 1.000000e+00 1.000000e+00 NA NA NA
CQA.proph..T1 1.000000e+00 1.000000e+00 1.000000e+00 NA NA
X10..EtOH.cont..PT 1.000000e+00 1.000000e+00 1.000000e+00 1.000000e+00 NA
X10..EtOH.cont..T1 9.388034e-08 4.657887e-07 5.038711e-08 7.523216e-06 4.228419e-11

## Sheet: Statistics_Fig3C
> args <- commandArgs(TRUE)
> options(warn=-1)
> data <- read.csv2(file.choose())
> cn<-colnames(data)
> min1<-min(data [,1][!is.na(data [,1])])
> min2<-min(data [,2][!is.na(data [,2])])
> min3<-min(data [,3][!is.na(data [,3])])
> min4<-min(data [,4][!is.na(data [,4])])
> miny=min(min1,min2,min3,min4)
> max1<-max(data [,1][!is.na(data [,1])])
> max2<-max(data [,2][!is.na(data [,2])])
> max3<-max(data [,3][!is.na(data [,3])])
> max4<-max(data [,4][!is.na(data [,4])])
> maxy=max(max1,max2,max3,max4)
> deltay<-(maxy-miny)
> print("Shapiro-Wilk-Test:")
[1] "Shapiro-Wilk-Test:"
> ps_1 <- shapiro.test(data [,1])$p.value
> ps_1
[1] 0.1902296
> ps_2 <- shapiro.test(data [,2])$p.value
> ps_2
[1] 0.00976378
> ps_3 <- shapiro.test(data [,3])$p.value
> ps_3
[1] 0.1924473
> ps_4 <- shapiro.test(data [,4])$p.value
> ps_4
[1] 0.2139748
> data2 <- tidyr::gather(data,"Typ","Wert",na.rm=TRUE)
> kruskal.test(data2$Wert, data2$Typ)
Kruskal-Wallis rank sum test
data: data2$Wert and data2$Typ
Kruskal-Wallis chi-squared = 26.354, df = 3, p-value = 8.042e-06
> print("none")
[1] "none"
> pwt <- pairwise.wilcox.test(data2$Wert, data2$Typ, p.adjust.method="none")$p.value
> pwt
control.novib CQA.cont..vib CQA.proph..Vib
CQA.cont..vib 0.261361433 NA NA
CQA.proph..Vib 0.365064725 8.479676e-01 NA
X10..EtOH.vib 0.006859675 3.706543e-06 0.000151011
> print("Holm:")
[1] "Holm:"
> pwt <- pairwise.wilcox.test(data2$Wert, data2$Typ, p.adjust.method="holm")$p.value
> pwt
control.novib CQA.cont..vib CQA.proph..Vib
CQA.cont..vib 0.7840843 NA NA
CQA.proph..Vib 0.7840843 8.479676e-01 NA
X10..EtOH.vib 0.0274387 2.223926e-05 0.0007550548

## Sheet: Statistics_Fig3D
> args <- commandArgs(TRUE)
> options(warn=-1)
> data <- read.csv2(file.choose())
> cn<-colnames(data)
> min1<-min(data [,1][!is.na(data [,1])])
> min2<-min(data [,2][!is.na(data [,2])])
> min3<-min(data [,3][!is.na(data [,3])])
> min4<-min(data [,4][!is.na(data [,4])])
> min5<-min(data [,5][!is.na(data [,5])])
> min6<-min(data [,6][!is.na(data [,6])])
> miny=min(min1,min2,min3,min4,min5,min6)
> max1<-max(data [,1][!is.na(data [,1])])
> max2<-max(data [,2][!is.na(data [,2])])
> max3<-max(data [,3][!is.na(data [,3])])
> max4<-max(data [,4][!is.na(data [,4])])
> max5<-max(data [,5][!is.na(data [,5])])
> max6<-max(data [,6][!is.na(data [,6])])
> maxy=max(max1,max2,max3,max4,max5,max6)
> deltay<-(maxy-miny)
> print("Shapiro-Wilk-Test:")
[1] "Shapiro-Wilk-Test:"
> ps_1 <- shapiro.test(data [,1])$p.value
> ps_1
[1] 9.618154e-07
> ps_2 <- shapiro.test(data [,2])$p.value
> ps_2
[1] 0.002228266
> ps_3 <- shapiro.test(data [,3])$p.value
> ps_3
[1] 0.001071387
> ps_4 <- shapiro.test(data [,4])$p.value
> ps_4
[1] 0.05273926
> ps_5 <- shapiro.test(data [,5])$p.value
> ps_5
[1] 3.888637e-05
> ps_6 <- shapiro.test(data [,6])$p.value
> ps_6
[1] 0.0248893
> data2 <- tidyr::gather(data,"Typ","Wert",na.rm=TRUE)
> kruskal.test(data2$Wert, data2$Typ)
Kruskal-Wallis rank sum test
data: data2$Wert and data2$Typ
Kruskal-Wallis chi-squared = 75.204, df = 5, p-value = 8.433e-15
> print("none")
[1] "none"
> pwt <- pairwise.wilcox.test(data2$Wert, data2$Typ, p.adjust.method="none")$p.value
> pwt
TT.cont..PT TT.cont..T1 TT.proph..PT TT.proph..T1 X10..EtOH.cont..PT
TT.cont..T1 2.113206e-02 NA NA NA NA
TT.proph..PT 2.961952e-01 0.0026882681 NA NA NA
TT.proph..T1 1.882689e-02 0.8643289729 3.154916e-03 NA NA
X10..EtOH.cont..PT 7.345712e-01 0.0025676672 3.512770e-01 0.0026309944 NA
X10..EtOH.cont..T1 2.886869e-08 0.0001076721 7.174326e-09 0.0001332863 2.818946e-12
> print("Holm:")
[1] "Holm:"
> pwt <- pairwise.wilcox.test(data2$Wert, data2$Typ, p.adjust.method="holm")$p.value
> pwt
TT.cont..PT TT.cont..T1 TT.proph..PT TT.proph..T1 X10..EtOH.cont..PT
TT.cont..T1 1.129613e-01 NA NA NA NA
TT.proph..PT 1.000000e+00 0.025676672 NA NA NA
TT.proph..T1 1.129613e-01 1.000000000 2.567667e-02 NA NA
X10..EtOH.cont..PT 1.000000e+00 0.025676672 1.000000e+00 0.025676672 NA
X10..EtOH.cont..T1 3.752930e-07 0.001292065 1.004406e-07 0.001466149 4.228419e-11

## Sheet: Statistics_Fig3E
> args <- commandArgs(TRUE)
> options(warn=-1)
> data <- read.csv2(file.choose())
> cn<-colnames(data)
> min1<-min(data [,1][!is.na(data [,1])])
> min2<-min(data [,2][!is.na(data [,2])])
> min3<-min(data [,3][!is.na(data [,3])])
> min4<-min(data [,4][!is.na(data [,4])])
> miny=min(min1,min2,min3,min4)
> max1<-max(data [,1][!is.na(data [,1])])
> max2<-max(data [,2][!is.na(data [,2])])
> max3<-max(data [,3][!is.na(data [,3])])
> max4<-max(data [,4][!is.na(data [,4])])
> maxy=max(max1,max2,max3,max4)
> deltay<-(maxy-miny)
> print("Shapiro-Wilk-Test:")
[1] "Shapiro-Wilk-Test:"
> ps_1 <- shapiro.test(data [,1])$p.value
> ps_1
[1] 0.1902296
> ps_2 <- shapiro.test(data [,2])$p.value
> ps_2
[1] 0.00976378
> ps_3 <- shapiro.test(data [,3])$p.value
> ps_3
[1] 0.04149778
> ps_4 <- shapiro.test(data [,4])$p.value
> ps_4
[1] 0.2194086
> data2 <- tidyr::gather(data,"Typ","Wert",na.rm=TRUE)
> kruskal.test(data2$Wert, data2$Typ)
Kruskal-Wallis rank sum test
data: data2$Wert and data2$Typ
Kruskal-Wallis chi-squared = 8.0011, df = 3, p-value = 0.04599
> print("none")
[1] "none"
> pwt <- pairwise.wilcox.test(data2$Wert, data2$Typ, p.adjust.method="none")$p.value
> pwt
control.novib TT.cont..vib TT.proph..vib
TT.cont..vib 0.113185003 NA NA
TT.proph..vib 0.059961132 0.6527611 NA
X10..EtOH.cont..vib 0.006859675 0.2833719 0.5397325
> print("Holm:")
[1] "Holm:"
> pwt <- pairwise.wilcox.test(data2$Wert, data2$Typ, p.adjust.method="holm")$p.value
> pwt
control.novib TT.cont..vib TT.proph..vib
TT.cont..vib 0.45274001 NA NA
TT.proph..vib 0.29980566 1.0000000 NA
X10..EtOH.cont..vib 0.04115805 0.8501158 1

## Sheet: Statistics_Fig3F
> args <- commandArgs(TRUE)
> options(warn=-1)
> data <- read.csv2(file.choose())
> cn<-colnames(data)
> min1<-min(data [,1][!is.na(data [,1])])
> min2<-min(data [,2][!is.na(data [,2])])
> min3<-min(data [,3][!is.na(data [,3])])
> min4<-min(data [,4][!is.na(data [,4])])
> min5<-min(data [,5][!is.na(data [,5])])
> min6<-min(data [,6][!is.na(data [,6])])
> miny=min(min1,min2,min3,min4,min5,min6)
> max1<-max(data [,1][!is.na(data [,1])])
> max2<-max(data [,2][!is.na(data [,2])])
> max3<-max(data [,3][!is.na(data [,3])])
> max4<-max(data [,4][!is.na(data [,4])])
> max5<-max(data [,5][!is.na(data [,5])])
> max6<-max(data [,6][!is.na(data [,6])])
> maxy=max(max1,max2,max3,max4,max5,max6)
> deltay<-(maxy-miny)
> print("Shapiro-Wilk-Test:")
[1] "Shapiro-Wilk-Test:"
> ps_1 <- shapiro.test(data [,1])$p.value
> ps_1
[1] 9.618154e-07
> ps_2 <- shapiro.test(data [,2])$p.value
> ps_2
[1] 0.002228266
> ps_3 <- shapiro.test(data [,3])$p.value
> ps_3
[1] 0.002995876
> ps_4 <- shapiro.test(data [,4])$p.value
> ps_4
[1] 0.03403594
> ps_5 <- shapiro.test(data [,5])$p.value
> ps_5
[1] 0.0002643316
> ps_6 <- shapiro.test(data [,6])$p.value
> ps_6
[1] 0.05269508
> data2 <- tidyr::gather(data,"Typ","Wert",na.rm=TRUE)
> kruskal.test(data2$Wert, data2$Typ)
Kruskal-Wallis rank sum test
data: data2$Wert and data2$Typ
Kruskal-Wallis chi-squared = 75.961, df = 5, p-value = 5.861e-15
> print("none")
[1] "none"
> pwt <- pairwise.wilcox.test(data2$Wert, data2$Typ, p.adjust.method="none")$p.value
> pwt
CQA.TT.cont..PT CQA.TT.cont..T1 CQA.TT.proph..PT CQA.TT.proph..T1 X10..EtOH.cont..PT
CQA.TT.cont..T1 7.699678e-02 NA NA NA NA
CQA.TT.proph..PT 4.290647e-01 2.271284e-02 NA NA NA
CQA.TT.proph..T1 5.543916e-03 3.819605e-01 1.764975e-03 NA NA
X10..EtOH.cont..PT 6.343716e-01 8.447230e-02 1.778446e-01 3.139522e-03 NA
X10..EtOH.cont..T1 3.573361e-09 6.430340e-06 3.599079e-09 3.903388e-05 2.818946e-12
> print("Holm:")
[1] "Holm:"
> pwt <- pairwise.wilcox.test(data2$Wert, data2$Typ, p.adjust.method="holm")$p.value
> pwt
CQA.TT.cont..PT CQA.TT.cont..T1 CQA.TT.proph..PT CQA.TT.proph..T1 X10..EtOH.cont..PT
CQA.TT.cont..T1 4.619807e-01 NA NA NA NA
CQA.TT.proph..PT 1.000000e+00 1.589899e-01 NA NA NA
CQA.TT.proph..T1 4.435132e-02 1.000000e+00 1.764975e-02 NA NA
X10..EtOH.cont..PT 1.000000e+00 4.619807e-01 7.113786e-01 0.0282556961 NA
X10..EtOH.cont..T1 5.002706e-08 7.716408e-05 5.002706e-08 0.0004293727 4.228419e-11

## Sheet: Statistics_Fig3G
> args <- commandArgs(TRUE)
> options(warn=-1)
> data <- read.csv2(file.choose())
> cn<-colnames(data)
> min1<-min(data [,1][!is.na(data [,1])])
> min2<-min(data [,2][!is.na(data [,2])])
> min3<-min(data [,3][!is.na(data [,3])])
> min4<-min(data [,4][!is.na(data [,4])])
> miny=min(min1,min2,min3,min4)
> max1<-max(data [,1][!is.na(data [,1])])
> max2<-max(data [,2][!is.na(data [,2])])
> max3<-max(data [,3][!is.na(data [,3])])
> max4<-max(data [,4][!is.na(data [,4])])
> maxy=max(max1,max2,max3,max4)
> deltay<-(maxy-miny)
> print("Shapiro-Wilk-Test:")
[1] "Shapiro-Wilk-Test:"
> ps_1 <- shapiro.test(data [,1])$p.value
> ps_1
[1] 0.1902296
> ps_2 <- shapiro.test(data [,2])$p.value
> ps_2
[1] 0.00976378
> ps_3 <- shapiro.test(data [,3])$p.value
> ps_3
[1] 0.05900901
> ps_4 <- shapiro.test(data [,4])$p.value
> ps_4
[1] 0.0378356
> data2 <- tidyr::gather(data,"Typ","Wert",na.rm=TRUE)
> kruskal.test(data2$Wert, data2$Typ)
Kruskal-Wallis rank sum test
data: data2$Wert and data2$Typ
Kruskal-Wallis chi-squared = 6.9763, df = 3, p-value = 0.07266
> print("none")
[1] "none"
> pwt <- pairwise.wilcox.test(data2$Wert, data2$Typ, p.adjust.method="none")$p.value
> pwt
control.novib CQA.TT.cont..vib CQA.TT.proph..vib
CQA.TT.cont..vib 0.329430327 NA NA
CQA.TT.proph..vib 0.249371201 0.8098273 NA
X10..EtOH.cont..vib 0.006859675 0.1555270 0.4668885
> print("Holm:")
[1] "Holm:"
> pwt <- pairwise.wilcox.test(data2$Wert, data2$Typ, p.adjust.method="holm")$p.value
> pwt
control.novib CQA.TT.cont..vib CQA.TT.proph..vib
CQA.TT.cont..vib 0.99748480 NA NA
CQA.TT.proph..vib 0.99748480 0.9974848 NA
X10..EtOH.cont..vib 0.04115805 0.7776351 0.9974848
