# Supplementary material for: Chlorogenic Acids, Acting via Calcineurin, Are the Main Compounds in Centella asiatica Extracts That Mediate Resilience to Chronic Stress in Drosophila melanogaster
Source: Nutrients. 2023 Sep 16;15(18):4016. doi: 10.3390/nu15184016 (PMC10537055; doi:10.3390/nu15184016)
Supplement: Supplementary file 1 [file nutrients-15-04016-s001.zip › Statistics_Figure4.xlsx]

## Sheet: Statistics_Fig4B
> args <- commandArgs(TRUE)
> options(warn=-1)
> data <- read.csv2(file.choose())
> cn<-colnames(data)
> min1<-min(data [,1][!is.na(data [,1])])
> min2<-min(data [,2][!is.na(data [,2])])
> min3<-min(data [,3][!is.na(data [,3])])
> min4<-min(data [,4][!is.na(data [,4])])
> min5<-min(data [,5][!is.na(data [,5])])
> min6<-min(data [,6][!is.na(data [,6])])
> miny=min(min1,min2,min3,min4,min5,min6)
> max1<-max(data [,1][!is.na(data [,1])])
> max2<-max(data [,2][!is.na(data [,2])])
> max3<-max(data [,3][!is.na(data [,3])])
> max4<-max(data [,4][!is.na(data [,4])])
> max5<-max(data [,5][!is.na(data [,5])])
> max6<-max(data [,6][!is.na(data [,6])])
> maxy=max(max1,max2,max3,max4,max5,max6)
> deltay<-(maxy-miny)
> print("Shapiro-Wilk-Test:")
[1] "Shapiro-Wilk-Test:"
> ps_1 <- shapiro.test(data [,1])$p.value
> ps_1
[1] 2.959783e-08
> ps_2 <- shapiro.test(data [,2])$p.value
> ps_2
[1] 0.005576638
> ps_3 <- shapiro.test(data [,3])$p.value
> ps_3
[1] 1.913631e-06
> ps_4 <- shapiro.test(data [,4])$p.value
> ps_4
[1] 0.004909046
> ps_5 <- shapiro.test(data [,5])$p.value
> ps_5
[1] 8.08037e-07
> ps_6 <- shapiro.test(data [,6])$p.value
> ps_6
[1] 0.09210517
> data2 <- tidyr::gather(data,"Typ","Wert",na.rm=TRUE)
> kruskal.test(data2$Wert, data2$Typ)
Kruskal-Wallis rank sum test
data: data2$Wert and data2$Typ
Kruskal-Wallis chi-squared = 65.327, df = 5, p-value = 9.585e-13
> print("none")
[1] "none"
> pwt <- pairwise.wilcox.test(data2$Wert, data2$Typ, p.adjust.method="none")$p.value
> pwt
CQAs.cont..PT CQAs.cont..T1 CQAs.pro..PT CQAs.pro..T1 X10..EtOH.cont..PT
CQAs.cont..T1 2.371864e-01 NA NA NA NA
CQAs.pro..PT 4.837455e-01 0.0894520961 NA NA NA
CQAs.pro..T1 1.410396e-02 0.6320140007 4.242200e-03 NA NA
X10..EtOH.cont..PT 3.650289e-01 0.0505677886 9.789011e-01 7.336071e-04 NA
X10..EtOH.cont..T1 1.540088e-07 0.0001786007 4.158563e-08 7.313999e-05 4.17628e-11
> print("Holm:")
[1] "Holm:"
> pwt <- pairwise.wilcox.test(data2$Wert, data2$Typ, p.adjust.method="holm")$p.value
> pwt
CQAs.cont..PT CQAs.cont..T1 CQAs.pro..PT CQAs.pro..T1 X10..EtOH.cont..PT
CQAs.cont..T1 1.000000e+00 NA NA NA NA
CQAs.pro..PT 1.000000e+00 0.536712577 NA NA NA
CQAs.pro..T1 1.128317e-01 1.000000000 3.817980e-02 NA NA
X10..EtOH.cont..PT 1.000000e+00 0.353974520 1.000000e+00 0.0073360705 NA
X10..EtOH.cont..T1 2.002114e-06 0.001964608 5.821989e-07 0.0008776798 6.26442e-10

## Sheet: Statistics_Fig4C
> args <- commandArgs(TRUE)
> options(warn=-1)
> data <- read.csv2(file.choose())
> cn<-colnames(data)
> min1<-min(data [,1][!is.na(data [,1])])
> min2<-min(data [,2][!is.na(data [,2])])
> min3<-min(data [,3][!is.na(data [,3])])
> min4<-min(data [,4][!is.na(data [,4])])
> miny=min(min1,min2,min3,min4)
> max1<-max(data [,1][!is.na(data [,1])])
> max2<-max(data [,2][!is.na(data [,2])])
> max3<-max(data [,3][!is.na(data [,3])])
> max4<-max(data [,4][!is.na(data [,4])])
> maxy=max(max1,max2,max3,max4)
> deltay<-(maxy-miny)
> print("Shapiro-Wilk-Test:")
[1] "Shapiro-Wilk-Test:"
> ps_1 <- shapiro.test(data [,1])$p.value
> ps_1
[1] 0.0261671
> ps_2 <- shapiro.test(data [,2])$p.value
> ps_2
[1] 0.02221728
> ps_3 <- shapiro.test(data [,3])$p.value
> ps_3
[1] 0.5528544
> ps_4 <- shapiro.test(data [,4])$p.value
> ps_4
[1] 0.652199
> data2 <- tidyr::gather(data,"Typ","Wert",na.rm=TRUE)
> kruskal.test(data2$Wert, data2$Typ)
Kruskal-Wallis rank sum test
data: data2$Wert and data2$Typ
Kruskal-Wallis chi-squared = 14.112, df = 3, p-value = 0.002756
> print("none")
[1] "none"
> pwt <- pairwise.wilcox.test(data2$Wert, data2$Typ, p.adjust.method="none")$p.value
> pwt
CQAs.cont..vib CQAs.proph..Vib NOVIB.ctrl
CQAs.proph..Vib 0.88447039 NA NA
NOVIB.ctrl 0.44464241 0.565870773 NA
X10..EtOH.cont..vib 0.01700563 0.007247287 0.002499746
> print("Holm:")
[1] "Holm:"
> pwt <- pairwise.wilcox.test(data2$Wert, data2$Typ, p.adjust.method="holm")$p.value
> pwt
CQAs.cont..vib CQAs.proph..Vib NOVIB.ctrl
CQAs.proph..Vib 1.00000000 NA NA
NOVIB.ctrl 1.00000000 1.00000000 NA
X10..EtOH.cont..vib 0.06802254 0.03623643 0.01499848

## Sheet: Statistics_Fig4D
> args <- commandArgs(TRUE)
> options(warn=-1)
> data <- read.csv2(file.choose())
> cn<-colnames(data)
> min1<-min(data [,1][!is.na(data [,1])])
> min2<-min(data [,2][!is.na(data [,2])])
> min3<-min(data [,3][!is.na(data [,3])])
> min4<-min(data [,4][!is.na(data [,4])])
> min5<-min(data [,5][!is.na(data [,5])])
> min6<-min(data [,6][!is.na(data [,6])])
> miny=min(min1,min2,min3,min4,min5,min6)
> max1<-max(data [,1][!is.na(data [,1])])
> max2<-max(data [,2][!is.na(data [,2])])
> max3<-max(data [,3][!is.na(data [,3])])
> max4<-max(data [,4][!is.na(data [,4])])
> max5<-max(data [,5][!is.na(data [,5])])
> max6<-max(data [,6][!is.na(data [,6])])
> maxy=max(max1,max2,max3,max4,max5,max6)
> deltay<-(maxy-miny)
> print("Shapiro-Wilk-Test:")
[1] "Shapiro-Wilk-Test:"
> ps_1 <- shapiro.test(data [,1])$p.value
> ps_1
[1] 2.959783e-08
> ps_2 <- shapiro.test(data [,2])$p.value
> ps_2
[1] 0.005576638
> ps_3 <- shapiro.test(data [,3])$p.value
> ps_3
[1] 4.112874e-05
> ps_4 <- shapiro.test(data [,4])$p.value
> ps_4
[1] 0.001308266
> ps_5 <- shapiro.test(data [,5])$p.value
> ps_5
[1] 2.071177e-05
> ps_6 <- shapiro.test(data [,6])$p.value
> ps_6
[1] 0.05528967
> data2 <- tidyr::gather(data,"Typ","Wert",na.rm=TRUE)
> kruskal.test(data2$Wert, data2$Typ)
Kruskal-Wallis rank sum test
data: data2$Wert and data2$Typ
Kruskal-Wallis chi-squared = 93.674, df = 5, p-value < 2.2e-16
> print("none")
[1] "none"
> pwt <- pairwise.wilcox.test(data2$Wert, data2$Typ, p.adjust.method="none")$p.value
> pwt
diCQAs.cont..PT diCQAs.cont..T1 diCQAs.pro..PT diCQAs.pro..T1 X10..EtOH.cont..PT
diCQAs.cont..T1 1.701261e-05 NA NA NA NA
diCQAs.pro..PT 5.101101e-01 1.179734e-05 NA NA NA
diCQAs.pro..T1 9.035253e-08 4.743278e-02 1.185534e-07 NA NA
X10..EtOH.cont..PT 7.422158e-01 8.089154e-07 2.932102e-01 7.231695e-10 NA
X10..EtOH.cont..T1 2.384977e-08 8.152861e-02 2.585699e-08 9.347978e-01 4.17628e-11
> print("Holm:")
[1] "Holm:"
> pwt <- pairwise.wilcox.test(data2$Wert, data2$Typ, p.adjust.method="holm")$p.value
> pwt
diCQAs.cont..PT diCQAs.cont..T1 diCQAs.pro..PT diCQAs.pro..T1 X10..EtOH.cont..PT
diCQAs.cont..T1 1.190883e-04 NA NA NA NA
diCQAs.pro..PT 1.000000e+00 9.437868e-05 NA NA NA
diCQAs.pro..T1 9.938778e-07 2.845967e-01 1.185534e-06 NA NA
X10..EtOH.cont..PT 1.000000e+00 7.280238e-06 1.000000e+00 1.012437e-08 NA
X10..EtOH.cont..T1 3.100470e-07 4.076431e-01 3.102839e-07 1.000000e+00 6.26442e-10

## Sheet: Statistics_Fig4E
> args <- commandArgs(TRUE)
> options(warn=-1)
> data <- read.csv2(file.choose())
> cn<-colnames(data)
> min1<-min(data [,1][!is.na(data [,1])])
> min2<-min(data [,2][!is.na(data [,2])])
> min3<-min(data [,3][!is.na(data [,3])])
> min4<-min(data [,4][!is.na(data [,4])])
> miny=min(min1,min2,min3,min4)
> max1<-max(data [,1][!is.na(data [,1])])
> max2<-max(data [,2][!is.na(data [,2])])
> max3<-max(data [,3][!is.na(data [,3])])
> max4<-max(data [,4][!is.na(data [,4])])
> maxy=max(max1,max2,max3,max4)
> deltay<-(maxy-miny)
> print("Shapiro-Wilk-Test:")
[1] "Shapiro-Wilk-Test:"
> ps_1 <- shapiro.test(data [,1])$p.value
> ps_1
[1] 0.0261671
> ps_2 <- shapiro.test(data [,2])$p.value
> ps_2
[1] 0.02221728
> ps_3 <- shapiro.test(data [,3])$p.value
> ps_3
[1] 0.004449616
> ps_4 <- shapiro.test(data [,4])$p.value
> ps_4
[1] 0.4205458
> data2 <- tidyr::gather(data,"Typ","Wert",na.rm=TRUE)
> kruskal.test(data2$Wert, data2$Typ)
Kruskal-Wallis rank sum test
data: data2$Wert and data2$Typ
Kruskal-Wallis chi-squared = 9.836, df = 3, p-value = 0.02001
> print("none")
[1] "none"
> pwt <- pairwise.wilcox.test(data2$Wert, data2$Typ, p.adjust.method="none")$p.value
> pwt
diCQAs.cont..vib diCQAs.proph..vib NOVIB.ctrl
diCQAs.proph..vib 0.97870273 NA NA
NOVIB.ctrl 0.03040731 0.03047711 NA
X10..EtOH.cont..vib 0.63219657 0.44640278 0.002499746
> print("Holm:")
[1] "Holm:"
> pwt <- pairwise.wilcox.test(data2$Wert, data2$Typ, p.adjust.method="holm")$p.value
> pwt
diCQAs.cont..vib diCQAs.proph..vib NOVIB.ctrl
diCQAs.proph..vib 1.0000000 NA NA
NOVIB.ctrl 0.1520365 0.1520365 NA
X10..EtOH.cont..vib 1.0000000 1.0000000 0.01499848
