# Supplementary material for: Chlorogenic Acids, Acting via Calcineurin, Are the Main Compounds in Centella asiatica Extracts That Mediate Resilience to Chronic Stress in Drosophila melanogaster
Source: Nutrients. 2023 Sep 16;15(18):4016. doi: 10.3390/nu15184016 (PMC10537055; doi:10.3390/nu15184016)
Supplement: Supplementary file 1 [file nutrients-15-04016-s001.zip › Statistics_Figure5.xlsx]

## Sheet: Statistics_Fig5B
> args <- commandArgs(TRUE)
> options(warn=-1)
> data <- read.csv2(file.choose())
> cn<-colnames(data)
> min1<-min(data [,1][!is.na(data [,1])])
> min2<-min(data [,2][!is.na(data [,2])])
> min3<-min(data [,3][!is.na(data [,3])])
> min4<-min(data [,4][!is.na(data [,4])])
> min5<-min(data [,5][!is.na(data [,5])])
> min6<-min(data [,6][!is.na(data [,6])])
> miny=min(min1,min2,min3,min4,min5,min6)
> max1<-max(data [,1][!is.na(data [,1])])
> max2<-max(data [,2][!is.na(data [,2])])
> max3<-max(data [,3][!is.na(data [,3])])
> max4<-max(data [,4][!is.na(data [,4])])
> max5<-max(data [,5][!is.na(data [,5])])
> max6<-max(data [,6][!is.na(data [,6])])
> maxy=max(max1,max2,max3,max4,max5,max6)
> deltay<-(maxy-miny)
> print("Shapiro-Wilk-Test:")
[1] "Shapiro-Wilk-Test:"
> ps_1 <- shapiro.test(data [,1])$p.value
> ps_1
[1] 2.959783e-08
> ps_2 <- shapiro.test(data [,2])$p.value
> ps_2
[1] 0.000378535
> ps_3 <- shapiro.test(data [,3])$p.value
> ps_3
[1] 0.0002727695
> ps_4 <- shapiro.test(data [,4])$p.value
> ps_4
[1] 0.001389507
> ps_5 <- shapiro.test(data [,5])$p.value
> ps_5
[1] 0.0004276361
> ps_6 <- shapiro.test(data [,6])$p.value
> ps_6
[1] 0.007201715
> data2 <- tidyr::gather(data,"Typ","Wert",na.rm=TRUE)
> kruskal.test(data2$Wert, data2$Typ)
Kruskal-Wallis rank sum test
data: data2$Wert and data2$Typ
Kruskal-Wallis chi-squared = 86.007, df = 5, p-value < 2.2e-16
> print("none")
[1] "none"
> pwt <- pairwise.wilcox.test(data2$Wert, data2$Typ, p.adjust.method="none")$p.value
> pwt
Neo.cont..PT Neo.cont..T1 Neo.pro..PT Neo.pro..T1 X10..EtOH.cont..PT
Neo.cont..T1 1.360583e-03 NA NA NA NA
Neo.pro..PT 8.791107e-01 0.0014676867 NA NA NA
Neo.pro..T1 1.274846e-06 0.0555331699 1.205583e-06 NA NA
X10..EtOH.cont..PT 9.965105e-02 0.0009485562 1.257796e-01 6.376311e-08 NA
X10..EtOH.cont..T1 6.328522e-09 0.0023310186 6.188484e-09 2.233394e-01 1.286909e-11
> print("Holm:")
[1] "Holm:"
> pwt <- pairwise.wilcox.test(data2$Wert, data2$Typ, p.adjust.method="holm")$p.value
> pwt
Neo.cont..PT Neo.cont..T1 Neo.pro..PT Neo.pro..T1 X10..EtOH.cont..PT
Neo.cont..T1 1.088466e-02 NA NA NA NA
Neo.pro..PT 8.791107e-01 0.010884662 NA NA NA
Neo.pro..T1 1.326142e-05 0.277665849 1.326142e-05 NA NA
X10..EtOH.cont..PT 3.986042e-01 0.008537006 3.986042e-01 7.651574e-07 NA
X10..EtOH.cont..T1 8.663878e-08 0.013986111 8.663878e-08 4.466787e-01 1.930364e-10

## Sheet: Statistics_Fig5C
> args <- commandArgs(TRUE)
> options(warn=-1)
> data <- read.csv2(file.choose())
> cn<-colnames(data)
> min1<-min(data [,1][!is.na(data [,1])])
> min2<-min(data [,2][!is.na(data [,2])])
> min3<-min(data [,3][!is.na(data [,3])])
> min4<-min(data [,4][!is.na(data [,4])])
> miny=min(min1,min2,min3,min4)
> max1<-max(data [,1][!is.na(data [,1])])
> max2<-max(data [,2][!is.na(data [,2])])
> max3<-max(data [,3][!is.na(data [,3])])
> max4<-max(data [,4][!is.na(data [,4])])
> maxy=max(max1,max2,max3,max4)
> deltay<-(maxy-miny)
> print("Shapiro-Wilk-Test:")
[1] "Shapiro-Wilk-Test:"
> ps_1 <- shapiro.test(data [,1])$p.value
> ps_1
[1] 0.2861562
> ps_2 <- shapiro.test(data [,2])$p.value
> ps_2
[1] 0.1453234
> ps_3 <- shapiro.test(data [,3])$p.value
> ps_3
[1] 0.07611576
> ps_4 <- shapiro.test(data [,4])$p.value
> ps_4
[1] 0.5598609
> data2 <- tidyr::gather(data,"Typ","Wert",na.rm=TRUE)
> kruskal.test(data2$Wert, data2$Typ)
Kruskal-Wallis rank sum test
data: data2$Wert and data2$Typ
Kruskal-Wallis chi-squared = 15.221, df = 3, p-value = 0.001637
> print("none")
[1] "none"
> pwt <- pairwise.wilcox.test(data2$Wert, data2$Typ, p.adjust.method="none")$p.value
> pwt
Neo.cont. Neo.pro. X10..EtOH.cont.
Neo.pro. 0.20484113 NA NA
X10..EtOH.cont. 0.31534160 0.506667468 NA
X10..ETOH.novib 0.07272787 0.001621515 0.0005507333
> print("Holm:")
[1] "Holm:"
> pwt <- pairwise.wilcox.test(data2$Wert, data2$Typ, p.adjust.method="holm")$p.value
> pwt
Neo.cont. Neo.pro. X10..EtOH.cont.
Neo.pro. 0.6145234 NA NA
X10..EtOH.cont. 0.6306832 0.630683199 NA
X10..ETOH.novib 0.2909115 0.008107575 0.0033044

## Sheet: Statistics_Fig5D
> args <- commandArgs(TRUE)
> options(warn=-1)
> data <- read.csv2(file.choose())
> cn<-colnames(data)
> min1<-min(data [,1][!is.na(data [,1])])
> min2<-min(data [,2][!is.na(data [,2])])
> min3<-min(data [,3][!is.na(data [,3])])
> min4<-min(data [,4][!is.na(data [,4])])
> min5<-min(data [,5][!is.na(data [,5])])
> min6<-min(data [,6][!is.na(data [,6])])
> miny=min(min1,min2,min3,min4,min5,min6)
> max1<-max(data [,1][!is.na(data [,1])])
> max2<-max(data [,2][!is.na(data [,2])])
> max3<-max(data [,3][!is.na(data [,3])])
> max4<-max(data [,4][!is.na(data [,4])])
> max5<-max(data [,5][!is.na(data [,5])])
> max6<-max(data [,6][!is.na(data [,6])])
> maxy=max(max1,max2,max3,max4,max5,max6)
> deltay<-(maxy-miny)
> print("Shapiro-Wilk-Test:")
[1] "Shapiro-Wilk-Test:"
> ps_1 <- shapiro.test(data [,1])$p.value
> ps_1
[1] 2.959783e-08
> ps_2 <- shapiro.test(data [,2])$p.value
> ps_2
[1] 0.000378535
> ps_3 <- shapiro.test(data [,3])$p.value
> ps_3
[1] 0.0003245084
> ps_4 <- shapiro.test(data [,4])$p.value
> ps_4
[1] 0.1251715
> ps_5 <- shapiro.test(data [,5])$p.value
> ps_5
[1] 5.991442e-05
> ps_6 <- shapiro.test(data [,6])$p.value
> ps_6
[1] 0.09718111
> data2 <- tidyr::gather(data,"Typ","Wert",na.rm=TRUE)
> kruskal.test(data2$Wert, data2$Typ)
Kruskal-Wallis rank sum test
data: data2$Wert and data2$Typ
Kruskal-Wallis chi-squared = 96.226, df = 5, p-value < 2.2e-16
> print("none")
[1] "none"
> pwt <- pairwise.wilcox.test(data2$Wert, data2$Typ, p.adjust.method="none")$p.value
> pwt
Chloro.cont..PT Chloro.cont..T1 Chloro.pro..PT Chloro.pro..T1 X10..EtOH.cont..PT
Chloro.cont..T1 2.019337e-06 NA NA NA NA
Chloro.pro..PT 9.074545e-01 6.601563e-06 NA NA NA
Chloro.pro..T1 1.999955e-07 5.114038e-02 8.374638e-07 NA NA
X10..EtOH.cont..PT 5.582788e-01 3.531136e-08 4.706863e-01 1.366474e-09 NA
X10..EtOH.cont..T1 1.775611e-08 4.755436e-01 1.240131e-07 1.684827e-01 1.286909e-11
> print("Holm:")
[1] "Holm:"
> pwt <- pairwise.wilcox.test(data2$Wert, data2$Typ, p.adjust.method="holm")$p.value
> pwt
Chloro.cont..PT Chloro.cont..T1 Chloro.pro..PT Chloro.pro..T1 X10..EtOH.cont..PT
Chloro.cont..T1 1.615469e-05 NA NA NA NA
Chloro.pro..PT 1.000000e+00 4.621094e-05 NA NA NA
Chloro.pro..T1 1.999955e-06 3.068423e-01 7.537174e-06 NA NA
X10..EtOH.cont..PT 1.000000e+00 4.237364e-07 1.000000e+00 1.913064e-08 NA
X10..EtOH.cont..T1 2.308295e-07 1.000000e+00 1.364145e-06 8.424133e-01 1.930364e-10

## Sheet: Statistics_Fig5E
> args <- commandArgs(TRUE)
> options(warn=-1)
> data <- read.csv2(file.choose())
> cn<-colnames(data)
> min1<-min(data [,1][!is.na(data [,1])])
> min2<-min(data [,2][!is.na(data [,2])])
> min3<-min(data [,3][!is.na(data [,3])])
> min4<-min(data [,4][!is.na(data [,4])])
> miny=min(min1,min2,min3,min4)
> max1<-max(data [,1][!is.na(data [,1])])
> max2<-max(data [,2][!is.na(data [,2])])
> max3<-max(data [,3][!is.na(data [,3])])
> max4<-max(data [,4][!is.na(data [,4])])
> maxy=max(max1,max2,max3,max4)
> deltay<-(maxy-miny)
> print("Shapiro-Wilk-Test:")
[1] "Shapiro-Wilk-Test:"
> ps_1 <- shapiro.test(data [,1])$p.value
> ps_1
[1] 0.2861562
> ps_2 <- shapiro.test(data [,2])$p.value
> ps_2
[1] 0.1453234
> ps_3 <- shapiro.test(data [,3])$p.value
> ps_3
[1] 0.06243921
> ps_4 <- shapiro.test(data [,4])$p.value
> ps_4
[1] 0.170807
> data2 <- tidyr::gather(data,"Typ","Wert",na.rm=TRUE)
> kruskal.test(data2$Wert, data2$Typ)
Kruskal-Wallis rank sum test
data: data2$Wert and data2$Typ
Kruskal-Wallis chi-squared = 20.841, df = 3, p-value = 0.0001136
> print("none")
[1] "none"
> pwt <- pairwise.wilcox.test(data2$Wert, data2$Typ, p.adjust.method="none")$p.value
> pwt
Chloro.cont. Chloro.pro. X10..EtOH.cont.
Chloro.pro. 0.843572413 NA NA
X10..EtOH.cont. 0.548259948 2.466871e-01 NA
X10..ETOH.novib 0.001166033 5.971873e-05 0.0005507333
> print("Holm:")
[1] "Holm:"
> pwt <- pairwise.wilcox.test(data2$Wert, data2$Typ, p.adjust.method="holm")$p.value
> pwt
Chloro.cont. Chloro.pro. X10..EtOH.cont.
Chloro.pro. 1.000000000 NA NA
X10..EtOH.cont. 1.000000000 0.7400613768 NA
X10..ETOH.novib 0.004664134 0.0003583124 0.002753666

## Sheet: Statistics_Fig5F
> args <- commandArgs(TRUE)
> options(warn=-1)
> data <- read.csv2(file.choose())
> cn<-colnames(data)
> min1<-min(data [,1][!is.na(data [,1])])
> min2<-min(data [,2][!is.na(data [,2])])
> min3<-min(data [,3][!is.na(data [,3])])
> min4<-min(data [,4][!is.na(data [,4])])
> min5<-min(data [,5][!is.na(data [,5])])
> min6<-min(data [,6][!is.na(data [,6])])
> miny=min(min1,min2,min3,min4,min5,min6)
> max1<-max(data [,1][!is.na(data [,1])])
> max2<-max(data [,2][!is.na(data [,2])])
> max3<-max(data [,3][!is.na(data [,3])])
> max4<-max(data [,4][!is.na(data [,4])])
> max5<-max(data [,5][!is.na(data [,5])])
> max6<-max(data [,6][!is.na(data [,6])])
> maxy=max(max1,max2,max3,max4,max5,max6)
> deltay<-(maxy-miny)
> print("Shapiro-Wilk-Test:")
[1] "Shapiro-Wilk-Test:"
> ps_1 <- shapiro.test(data [,1])$p.value
> ps_1
[1] 2.959783e-08
> ps_2 <- shapiro.test(data [,2])$p.value
> ps_2
[1] 0.000378535
> ps_3 <- shapiro.test(data [,3])$p.value
> ps_3
[1] 0.0004342394
> ps_4 <- shapiro.test(data [,4])$p.value
> ps_4
[1] 0.06226041
> ps_5 <- shapiro.test(data [,5])$p.value
> ps_5
[1] 0.002323874
> ps_6 <- shapiro.test(data [,6])$p.value
> ps_6
[1] 0.1047627
> data2 <- tidyr::gather(data,"Typ","Wert",na.rm=TRUE)
> kruskal.test(data2$Wert, data2$Typ)
Kruskal-Wallis rank sum test
data: data2$Wert and data2$Typ
Kruskal-Wallis chi-squared = 94.513, df = 5, p-value < 2.2e-16
> print("none")
[1] "none"
> pwt <- pairwise.wilcox.test(data2$Wert, data2$Typ, p.adjust.method="none")$p.value
> pwt
Crypto.con..PT Crypto.con..T1 Crypto.pro..PT Crypto.pro..T1 X10..EtOH.cont..PT
Crypto.con..T1 2.275365e-06 NA NA NA NA
Crypto.pro..PT 2.623604e-01 6.991705e-06 NA NA NA
Crypto.pro..T1 8.144529e-07 7.763677e-02 1.815585e-06 NA NA
X10..EtOH.cont..PT 1.561454e-02 2.155794e-07 2.221325e-01 2.226853e-08 NA
X10..EtOH.cont..T1 6.208221e-09 2.421942e-01 2.658240e-08 2.581010e-01 1.286909e-11
> print("Holm:")
[1] "Holm:"
> pwt <- pairwise.wilcox.test(data2$Wert, data2$Typ, p.adjust.method="holm")$p.value
> pwt
Crypto.con..PT Crypto.con..T1 Crypto.pro..PT Crypto.pro..T1 X10..EtOH.cont..PT
Crypto.con..T1 1.820292e-05 NA NA NA NA
Crypto.pro..PT 8.885300e-01 4.894194e-05 NA NA NA
Crypto.pro..T1 8.144529e-06 3.881839e-01 1.634026e-05 NA NA
X10..EtOH.cont..PT 9.368723e-02 2.371374e-06 8.885300e-01 2.894909e-07 NA
X10..EtOH.cont..T1 8.691509e-08 8.885300e-01 3.189888e-07 8.885300e-01 1.930364e-10

## Sheet: Statistics_Fig5G
> args <- commandArgs(TRUE)
> options(warn=-1)
> data <- read.csv2(file.choose())
> cn<-colnames(data)
> min1<-min(data [,1][!is.na(data [,1])])
> min2<-min(data [,2][!is.na(data [,2])])
> min3<-min(data [,3][!is.na(data [,3])])
> min4<-min(data [,4][!is.na(data [,4])])
> miny=min(min1,min2,min3,min4)
> max1<-max(data [,1][!is.na(data [,1])])
> max2<-max(data [,2][!is.na(data [,2])])
> max3<-max(data [,3][!is.na(data [,3])])
> max4<-max(data [,4][!is.na(data [,4])])
> maxy=max(max1,max2,max3,max4)
> deltay<-(maxy-miny)
> print("Shapiro-Wilk-Test:")
[1] "Shapiro-Wilk-Test:"
> ps_1 <- shapiro.test(data [,1])$p.value
> ps_1
[1] 0.2861562
> ps_2 <- shapiro.test(data [,2])$p.value
> ps_2
[1] 0.1453234
> ps_3 <- shapiro.test(data [,3])$p.value
> ps_3
[1] 0.2143946
> ps_4 <- shapiro.test(data [,4])$p.value
> ps_4
[1] 0.3552379
> data2 <- tidyr::gather(data,"Typ","Wert",na.rm=TRUE)
> kruskal.test(data2$Wert, data2$Typ)
Kruskal-Wallis rank sum test
data: data2$Wert and data2$Typ
Kruskal-Wallis chi-squared = 21.863, df = 3, p-value = 6.965e-05
> print("none")
[1] "none"
> pwt <- pairwise.wilcox.test(data2$Wert, data2$Typ, p.adjust.method="none")$p.value
> pwt
Crypto.con. Crypto.pro. X10..EtOH.cont.
Crypto.pro. 0.37968545 NA NA
X10..EtOH.cont. 0.55576930 8.745828e-02 NA
X10..ETOH.novib 0.00132064 5.049016e-05 0.0005507333
> print("Holm:")
[1] "Holm:"
> pwt <- pairwise.wilcox.test(data2$Wert, data2$Typ, p.adjust.method="holm")$p.value
> pwt
Crypto.con. Crypto.pro. X10..EtOH.cont.
Crypto.pro. 0.759370894 NA NA
X10..EtOH.cont. 0.759370894 0.262374843 NA
X10..ETOH.novib 0.005282562 0.000302941 0.002753666
