# Supplementary material for: Chlorogenic Acids, Acting via Calcineurin, Are the Main Compounds in Centella asiatica Extracts That Mediate Resilience to Chronic Stress in Drosophila melanogaster
Source: Nutrients. 2023 Sep 16;15(18):4016. doi: 10.3390/nu15184016 (PMC10537055; doi:10.3390/nu15184016)
Supplement: Supplementary file 1 [file nutrients-15-04016-s001.zip › Statistics_Figure6.xlsx]

## Sheet: Statistics_Fig6B
> args <- commandArgs(TRUE)
> options(warn=-1)
> data <- read.csv2(file.choose())
> cn<-colnames(data)
> min1<-min(data [,1][!is.na(data [,1])])
> min2<-min(data [,2][!is.na(data [,2])])
> min3<-min(data [,3][!is.na(data [,3])])
> min4<-min(data [,4][!is.na(data [,4])])
> min5<-min(data [,5][!is.na(data [,5])])
> min6<-min(data [,6][!is.na(data [,6])])
> miny=min(min1,min2,min3,min4,min5,min6)
> max1<-max(data [,1][!is.na(data [,1])])
> max2<-max(data [,2][!is.na(data [,2])])
> max3<-max(data [,3][!is.na(data [,3])])
> max4<-max(data [,4][!is.na(data [,4])])
> max5<-max(data [,5][!is.na(data [,5])])
> max6<-max(data [,6][!is.na(data [,6])])
> maxy=max(max1,max2,max3,max4,max5,max6)
> deltay<-(maxy-miny)
> print("Shapiro-Wilk-Test:")
[1] "Shapiro-Wilk-Test:"
> ps_1 <- shapiro.test(data [,1])$p.value
> ps_1
[1] 2.561661e-05
> ps_2 <- shapiro.test(data [,2])$p.value
> ps_2
[1] 0.1061702
> ps_3 <- shapiro.test(data [,3])$p.value
> ps_3
[1] 0.00861758
> ps_4 <- shapiro.test(data [,4])$p.value
> ps_4
[1] 0.03430432
> ps_5 <- shapiro.test(data [,5])$p.value
> ps_5
[1] 2.047071e-05
> ps_6 <- shapiro.test(data [,6])$p.value
> ps_6
[1] 0.02626497
> data2 <- tidyr::gather(data,"Typ","Wert",na.rm=TRUE)
> kruskal.test(data2$Wert, data2$Typ)
Kruskal-Wallis rank sum test
data: data2$Wert and data2$Typ
Kruskal-Wallis chi-squared = 50.832, df = 5, p-value = 9.364e-10
> print("none")
[1] "none"
> pwt <- pairwise.wilcox.test(data2$Wert, data2$Typ, p.adjust.method="none")$p.value
> pwt
Chloro.Neo.cont..PT Chloro.Neo.cont..T1 Chloro.Neo.pro..PT Chloro.Neo.pro..T1 X10..EtOH.cont..PT
Chloro.Neo.cont..T1 0.0192493651 NA NA NA NA
Chloro.Neo.pro..PT 0.1150806569 3.545535e-01 NA NA NA
Chloro.Neo.pro..T1 0.0002640644 1.366398e-05 3.730856e-05 NA NA
X10..EtOH.cont..PT 0.9102587512 1.453695e-02 8.960652e-02 0.000408083 NA
X10..EtOH.cont..T1 0.0000535798 4.448372e-06 1.039557e-05 0.206383917 8.936049e-05
> print("Holm:")
[1] "Holm:"
> pwt <- pairwise.wilcox.test(data2$Wert, data2$Typ, p.adjust.method="holm")$p.value
> pwt
Chloro.Neo.cont..PT Chloro.Neo.cont..T1 Chloro.Neo.pro..PT Chloro.Neo.pro..T1 X10..EtOH.cont..PT
Chloro.Neo.cont..T1 0.1154961907 NA NA NA NA
Chloro.Neo.pro..PT 0.4603226275 7.091069e-01 NA NA NA
Chloro.Neo.pro..T1 0.0023765792 1.776318e-04 0.0004477027 NA NA
X10..EtOH.cont..PT 0.9102587512 1.017586e-01 0.4480325951 0.003264664 NA
X10..EtOH.cont..T1 0.0005893779 6.672558e-05 0.0001455380 0.619151751 0.0008936049

## Sheet: Statistics_Fig6C
> args <- commandArgs(TRUE)
> options(warn=-1)
> data <- read.csv2(file.choose())
> cn<-colnames(data)
> min1<-min(data [,1][!is.na(data [,1])])
> min2<-min(data [,2][!is.na(data [,2])])
> min3<-min(data [,3][!is.na(data [,3])])
> min4<-min(data [,4][!is.na(data [,4])])
> miny=min(min1,min2,min3,min4)
> max1<-max(data [,1][!is.na(data [,1])])
> max2<-max(data [,2][!is.na(data [,2])])
> max3<-max(data [,3][!is.na(data [,3])])
> max4<-max(data [,4][!is.na(data [,4])])
> maxy=max(max1,max2,max3,max4)
> deltay<-(maxy-miny)
> print("Shapiro-Wilk-Test:")
[1] "Shapiro-Wilk-Test:"
> ps_1 <- shapiro.test(data [,1])$p.value
> ps_1
[1] 0.03116767
> ps_2 <- shapiro.test(data [,2])$p.value
> ps_2
[1] 0.7772429
> ps_3 <- shapiro.test(data [,3])$p.value
> ps_3
[1] 0.08728536
> ps_4 <- shapiro.test(data [,4])$p.value
> ps_4
[1] 0.3496545
> data2 <- tidyr::gather(data,"Typ","Wert",na.rm=TRUE)
> kruskal.test(data2$Wert, data2$Typ)
Kruskal-Wallis rank sum test
data: data2$Wert and data2$Typ
Kruskal-Wallis chi-squared = 23.407, df = 3, p-value = 3.322e-05
> print("none")
[1] "none"
> pwt <- pairwise.wilcox.test(data2$Wert, data2$Typ, p.adjust.method="none")$p.value
> pwt
Chloro.Neo.cont. Chloro.Neo.pro. X10..EtOH.cont.
Chloro.Neo.pro. 0.5726433994 NA NA
X10..EtOH.cont. 0.0009870974 0.0006685851 NA
X10..ETOH.novib 0.1196393016 0.4113963394 8.615554e-06
> print("Holm:")
[1] "Holm:"
> pwt <- pairwise.wilcox.test(data2$Wert, data2$Typ, p.adjust.method="holm")$p.value
> pwt
Chloro.Neo.cont. Chloro.Neo.pro. X10..EtOH.cont.
Chloro.Neo.pro. 0.82279268 NA NA
X10..EtOH.cont. 0.00394839 0.003342926 NA
X10..ETOH.novib 0.35891790 0.822792679 5.169333e-05

## Sheet: Statistics_Fig6D
> args <- commandArgs(TRUE)
> options(warn=-1)
> data <- read.csv2(file.choose())
> cn<-colnames(data)
> min1<-min(data [,1][!is.na(data [,1])])
> min2<-min(data [,2][!is.na(data [,2])])
> min3<-min(data [,3][!is.na(data [,3])])
> min4<-min(data [,4][!is.na(data [,4])])
> min5<-min(data [,5][!is.na(data [,5])])
> min6<-min(data [,6][!is.na(data [,6])])
> miny=min(min1,min2,min3,min4,min5,min6)
> max1<-max(data [,1][!is.na(data [,1])])
> max2<-max(data [,2][!is.na(data [,2])])
> max3<-max(data [,3][!is.na(data [,3])])
> max4<-max(data [,4][!is.na(data [,4])])
> max5<-max(data [,5][!is.na(data [,5])])
> max6<-max(data [,6][!is.na(data [,6])])
> maxy=max(max1,max2,max3,max4,max5,max6)
> deltay<-(maxy-miny)
> print("Shapiro-Wilk-Test:")
[1] "Shapiro-Wilk-Test:"
> ps_1 <- shapiro.test(data [,1])$p.value
> ps_1
[1] 2.561661e-05
> ps_2 <- shapiro.test(data [,2])$p.value
> ps_2
[1] 0.1061702
> ps_3 <- shapiro.test(data [,3])$p.value
> ps_3
[1] 0.00320412
> ps_4 <- shapiro.test(data [,4])$p.value
> ps_4
[1] 0.1128817
> ps_5 <- shapiro.test(data [,5])$p.value
> ps_5
[1] 2.16351e-06
> ps_6 <- shapiro.test(data [,6])$p.value
> ps_6
[1] 0.3717073
> data2 <- tidyr::gather(data,"Typ","Wert",na.rm=TRUE)
> kruskal.test(data2$Wert, data2$Typ)
Kruskal-Wallis rank sum test
data: data2$Wert and data2$Typ
Kruskal-Wallis chi-squared = 26.946, df = 5, p-value = 5.845e-05
> print("none")
[1] "none"
> pwt <- pairwise.wilcox.test(data2$Wert, data2$Typ, p.adjust.method="none")$p.value
> pwt
Chloro..Crypto.cont..PT Chloro..Crypto.cont..T1 Chloro..Crypto.pro..PT Chloro..Crypto.pro..T1 X10..EtOH.cont..PT
Chloro..Crypto.cont..T1 0.5482549317 NA NA NA NA
Chloro..Crypto.pro..PT 0.1077338674 0.5292946051 NA NA NA
Chloro..Crypto.pro..T1 0.3340290855 0.8458670335 6.629984e-01 NA NA
X10..EtOH.cont..PT 0.7109695014 0.7873066071 2.366585e-01 0.5381319736 NA
X10..EtOH.cont..T1 0.0001318311 0.0006173662 2.243719e-05 0.0001513228 8.936049e-05
> print("Holm:")
[1] "Holm:"
> pwt <- pairwise.wilcox.test(data2$Wert, data2$Typ, p.adjust.method="holm")$p.value
> pwt
Chloro..Crypto.cont..PT Chloro..Crypto.cont..T1 Chloro..Crypto.pro..PT Chloro..Crypto.pro..T1 X10..EtOH.cont..PT
Chloro..Crypto.cont..T1 1.000000000 NA NA NA NA
Chloro..Crypto.pro..PT 1.000000000 1.000000000 NA NA NA
Chloro..Crypto.pro..T1 1.000000000 1.000000000 1.0000000000 NA NA
X10..EtOH.cont..PT 1.000000000 1.000000000 1.0000000000 1.000000000 NA
X10..EtOH.cont..T1 0.001713804 0.006791028 0.0003365578 0.001815874 0.0001251047

## Sheet: Statistics_Fig6E
> args <- commandArgs(TRUE)
> options(warn=-1)
> data <- read.csv2(file.choose())
> cn<-colnames(data)
> min1<-min(data [,1][!is.na(data [,1])])
> min2<-min(data [,2][!is.na(data [,2])])
> min3<-min(data [,3][!is.na(data [,3])])
> min4<-min(data [,4][!is.na(data [,4])])
> miny=min(min1,min2,min3,min4)
> max1<-max(data [,1][!is.na(data [,1])])
> max2<-max(data [,2][!is.na(data [,2])])
> max3<-max(data [,3][!is.na(data [,3])])
> max4<-max(data [,4][!is.na(data [,4])])
> maxy=max(max1,max2,max3,max4)
> deltay<-(maxy-miny)
> print("Shapiro-Wilk-Test:")
[1] "Shapiro-Wilk-Test:"
> ps_1 <- shapiro.test(data [,1])$p.value
> ps_1
[1] 0.03116767
> ps_2 <- shapiro.test(data [,2])$p.value
> ps_2
[1] 0.7772429
> ps_3 <- shapiro.test(data [,3])$p.value
> ps_3
[1] 0.33562
> ps_4 <- shapiro.test(data [,4])$p.value
> ps_4
[1] 0.0008845437
> data2 <- tidyr::gather(data,"Typ","Wert",na.rm=TRUE)
> kruskal.test(data2$Wert, data2$Typ)
Kruskal-Wallis rank sum test
data: data2$Wert and data2$Typ
Kruskal-Wallis chi-squared = 24.245, df = 3, p-value = 2.22e-05
> print("none")
[1] "none"
> pwt <- pairwise.wilcox.test(data2$Wert, data2$Typ, p.adjust.method="none")$p.value
> pwt
Chloro..Crypto.cont. Chloro..Crypto.pro. X10..EtOH.cont.
Chloro..Crypto.pro. 0.19854955 NA NA
X10..EtOH.cont. 0.00323037 0.0006727165 NA
X10..ETOH.novib 0.01314357 0.4156576867 8.615554e-06
> print("Holm:")
[1] "Holm:"
> pwt <- pairwise.wilcox.test(data2$Wert, data2$Typ, p.adjust.method="holm")$p.value
> pwt
Chloro..Crypto.cont. Chloro..Crypto.pro. X10..EtOH.cont.
Chloro..Crypto.pro. 0.39709910 NA NA
X10..EtOH.cont. 0.01292148 0.003363583 NA
X10..ETOH.novib 0.03943072 0.415657687 5.169333e-05

## Sheet: Statistics_Fig6F
> args <- commandArgs(TRUE)
> options(warn=-1)
> data <- read.csv2(file.choose())
> cn<-colnames(data)
> min1<-min(data [,1][!is.na(data [,1])])
> min2<-min(data [,2][!is.na(data [,2])])
> min3<-min(data [,3][!is.na(data [,3])])
> min4<-min(data [,4][!is.na(data [,4])])
> min5<-min(data [,5][!is.na(data [,5])])
> min6<-min(data [,6][!is.na(data [,6])])
> miny=min(min1,min2,min3,min4,min5,min6)
> max1<-max(data [,1][!is.na(data [,1])])
> max2<-max(data [,2][!is.na(data [,2])])
> max3<-max(data [,3][!is.na(data [,3])])
> max4<-max(data [,4][!is.na(data [,4])])
> max5<-max(data [,5][!is.na(data [,5])])
> max6<-max(data [,6][!is.na(data [,6])])
> maxy=max(max1,max2,max3,max4,max5,max6)
> deltay<-(maxy-miny)
> print("Shapiro-Wilk-Test:")
[1] "Shapiro-Wilk-Test:"
> ps_1 <- shapiro.test(data [,1])$p.value
> ps_1
[1] 2.561661e-05
> ps_2 <- shapiro.test(data [,2])$p.value
> ps_2
[1] 0.1061702
> ps_3 <- shapiro.test(data [,3])$p.value
> ps_3
[1] 0.0008608715
> ps_4 <- shapiro.test(data [,4])$p.value
> ps_4
[1] 0.3336121
> ps_5 <- shapiro.test(data [,5])$p.value
> ps_5
[1] 0.0002653013
> ps_6 <- shapiro.test(data [,6])$p.value
> ps_6
[1] 0.02701107
> data2 <- tidyr::gather(data,"Typ","Wert",na.rm=TRUE)
> kruskal.test(data2$Wert, data2$Typ)
Kruskal-Wallis rank sum test
data: data2$Wert and data2$Typ
Kruskal-Wallis chi-squared = 40.665, df = 5, p-value = 1.096e-07
> print("none")
[1] "none"
> pwt <- pairwise.wilcox.test(data2$Wert, data2$Typ, p.adjust.method="none")$p.value
> pwt
Crypto.Neo.con..PT Crypto.Neo.con..T1 Crypto.Neo.pro..PT Crypto.Neo.pro..T1 X10..EtOH.cont..PT
Crypto.Neo.con..T1 1.000603e-03 NA NA NA NA
Crypto.Neo.pro..PT 5.825543e-01 0.0003422931 NA NA NA
Crypto.Neo.pro..T1 7.044182e-04 0.9196456087 3.277748e-04 NA NA
X10..EtOH.cont..PT 7.724231e-01 0.0019854262 3.523848e-01 0.001205173 NA
X10..EtOH.cont..T1 5.155009e-05 0.4435876529 2.686055e-05 0.542163952 8.936049e-05
> print("Holm:")
[1] "Holm:"
> pwt <- pairwise.wilcox.test(data2$Wert, data2$Typ, p.adjust.method="holm")$p.value
> pwt
Crypto.Neo.con..PT Crypto.Neo.con..T1 Crypto.Neo.pro..PT Crypto.Neo.pro..T1 X10..EtOH.cont..PT
Crypto.Neo.con..T1 0.0090054268 NA NA NA NA
Crypto.Neo.pro..PT 1.0000000000 0.003933297 NA NA NA
Crypto.Neo.pro..T1 0.0070441817 1.000000000 0.0039332972 NA NA
X10..EtOH.cont..PT 1.0000000000 0.013897983 1.0000000000 0.009641381 NA
X10..EtOH.cont..T1 0.0007217012 1.000000000 0.0004029083 1.000000000 0.0001161686

## Sheet: Statistics_Fig6G
> args <- commandArgs(TRUE)
> options(warn=-1)
> data <- read.csv2(file.choose())
> cn<-colnames(data)
> min1<-min(data [,1][!is.na(data [,1])])
> min2<-min(data [,2][!is.na(data [,2])])
> min3<-min(data [,3][!is.na(data [,3])])
> min4<-min(data [,4][!is.na(data [,4])])
> miny=min(min1,min2,min3,min4)
> max1<-max(data [,1][!is.na(data [,1])])
> max2<-max(data [,2][!is.na(data [,2])])
> max3<-max(data [,3][!is.na(data [,3])])
> max4<-max(data [,4][!is.na(data [,4])])
> maxy=max(max1,max2,max3,max4)
> deltay<-(maxy-miny)
> print("Shapiro-Wilk-Test:")
[1] "Shapiro-Wilk-Test:"
> ps_1 <- shapiro.test(data [,1])$p.value
> ps_1
[1] 0.03116767
> ps_2 <- shapiro.test(data [,2])$p.value
> ps_2
[1] 0.7772429
> ps_3 <- shapiro.test(data [,3])$p.value
> ps_3
[1] 0.08905731
> ps_4 <- shapiro.test(data [,4])$p.value
> ps_4
[1] 0.1459861
> data2 <- tidyr::gather(data,"Typ","Wert",na.rm=TRUE)
> kruskal.test(data2$Wert, data2$Typ)
Kruskal-Wallis rank sum test
data: data2$Wert and data2$Typ
Kruskal-Wallis chi-squared = 25.6, df = 3, p-value = 1.156e-05
> print("none")
[1] "none"
> pwt <- pairwise.wilcox.test(data2$Wert, data2$Typ, p.adjust.method="none")$p.value
> pwt
Crypto.Neo.con. Crypto.Neo.pro. X10..EtOH.cont.
Crypto.Neo.pro. 0.7463563816 NA NA
X10..EtOH.cont. 0.0654634688 0.05890153 NA
X10..ETOH.novib 0.0002796459 0.00112458 8.615554e-06
> print("Holm:")
[1] "Holm:"
> pwt <- pairwise.wilcox.test(data2$Wert, data2$Typ, p.adjust.method="holm")$p.value
> pwt
Crypto.Neo.con. Crypto.Neo.pro. X10..EtOH.cont.
Crypto.Neo.pro. 0.746356382 NA NA
X10..EtOH.cont. 0.176704581 0.176704581 NA
X10..ETOH.novib 0.001398229 0.004498318 5.169333e-05

## Sheet: Statistics_Fig6H
> args <- commandArgs(TRUE)
> options(warn=-1)
> data <- read.csv2(file.choose())
> cn<-colnames(data)
> min1<-min(data [,1][!is.na(data [,1])])
> min2<-min(data [,2][!is.na(data [,2])])
> min3<-min(data [,3][!is.na(data [,3])])
> min4<-min(data [,4][!is.na(data [,4])])
> min5<-min(data [,5][!is.na(data [,5])])
> min6<-min(data [,6][!is.na(data [,6])])
> miny=min(min1,min2,min3,min4,min5,min6)
> max1<-max(data [,1][!is.na(data [,1])])
> max2<-max(data [,2][!is.na(data [,2])])
> max3<-max(data [,3][!is.na(data [,3])])
> max4<-max(data [,4][!is.na(data [,4])])
> max5<-max(data [,5][!is.na(data [,5])])
> max6<-max(data [,6][!is.na(data [,6])])
> maxy=max(max1,max2,max3,max4,max5,max6)
> deltay<-(maxy-miny)
> print("Shapiro-Wilk-Test:")
[1] "Shapiro-Wilk-Test:"
> ps_1 <- shapiro.test(data [,1])$p.value
> ps_1
[1] 0.0001597711
> ps_2 <- shapiro.test(data [,2])$p.value
> ps_2
[1] 0.2206201
> ps_3 <- shapiro.test(data [,3])$p.value
> ps_3
[1] 0.0001251492
> ps_4 <- shapiro.test(data [,4])$p.value
> ps_4
[1] 0.02444908
> ps_5 <- shapiro.test(data [,5])$p.value
> ps_5
[1] 0.0009179181
> ps_6 <- shapiro.test(data [,6])$p.value
> ps_6
[1] 0.08227372
> data2 <- tidyr::gather(data,"Typ","Wert",na.rm=TRUE)
> kruskal.test(data2$Wert, data2$Typ)
Kruskal-Wallis rank sum test
data: data2$Wert and data2$Typ
Kruskal-Wallis chi-squared = 49.788, df = 5, p-value = 1.531e-09
> print("none")
[1] "none"
> pwt <- pairwise.wilcox.test(data2$Wert, data2$Typ, p.adjust.method="none")$p.value
> pwt
X1.7xNeo.Crypto.cont..PT X1.7xNeo.Crypto.cont..T1 X1.7xNeo.Crypto.pro..PT X1.7xNeo.Crypto.pro..T1 X10..EtOH.PT
X1.7xNeo.Crypto.cont..T1 2.773192e-06 NA NA NA NA
X1.7xNeo.Crypto.pro..PT 5.347378e-01 2.802637e-06 NA NA NA
X1.7xNeo.Crypto.pro..T1 6.937846e-04 1.170040e-02 0.0012580626 NA NA
X10..EtOH.PT 8.956399e-01 2.560081e-06 0.6266345711 0.0006360009 NA
X10..EtOH.T1 2.732261e-04 1.142483e-01 0.0004810483 0.3303221129 0.0003553821
> print("Holm:")
[1] "Holm:"
> pwt <- pairwise.wilcox.test(data2$Wert, data2$Typ, p.adjust.method="holm")$p.value
> pwt
X1.7xNeo.Crypto.cont..PT X1.7xNeo.Crypto.cont..T1 X1.7xNeo.Crypto.pro..PT X1.7xNeo.Crypto.pro..T1 X10..EtOH.PT
X1.7xNeo.Crypto.cont..T1 3.882469e-05 NA NA NA NA
X1.7xNeo.Crypto.pro..PT 1.000000e+00 3.882469e-05 NA NA NA
X1.7xNeo.Crypto.pro..T1 5.724008e-03 7.020242e-02 0.008806438 NA NA
X10..EtOH.PT 1.000000e+00 3.840121e-05 1.000000000 0.005724008 NA
X10..EtOH.T1 3.278713e-03 5.712415e-01 0.004810483 1.000000000 0.003909203

## Sheet: Statistics_Fig6I
> args <- commandArgs(TRUE)
> options(warn=-1)
> data <- read.csv2(file.choose())
> cn<-colnames(data)
> min1<-min(data [,1][!is.na(data [,1])])
> min2<-min(data [,2][!is.na(data [,2])])
> min3<-min(data [,3][!is.na(data [,3])])
> min4<-min(data [,4][!is.na(data [,4])])
> miny=min(min1,min2,min3,min4)
> max1<-max(data [,1][!is.na(data [,1])])
> max2<-max(data [,2][!is.na(data [,2])])
> max3<-max(data [,3][!is.na(data [,3])])
> max4<-max(data [,4][!is.na(data [,4])])
> maxy=max(max1,max2,max3,max4)
> deltay<-(maxy-miny)
> print("Shapiro-Wilk-Test:")
[1] "Shapiro-Wilk-Test:"
> ps_1 <- shapiro.test(data [,1])$p.value
> ps_1
[1] 0.008548551
> ps_2 <- shapiro.test(data [,2])$p.value
> ps_2
[1] 0.005135633
> ps_3 <- shapiro.test(data [,3])$p.value
> ps_3
[1] 0.004001967
> ps_4 <- shapiro.test(data [,4])$p.value
> ps_4
[1] 0.1145352
> data2 <- tidyr::gather(data,"Typ","Wert",na.rm=TRUE)
> kruskal.test(data2$Wert, data2$Typ)
Kruskal-Wallis rank sum test
data: data2$Wert and data2$Typ
Kruskal-Wallis chi-squared = 38.294, df = 3, p-value = 2.449e-08
> print("none")
[1] "none"
> pwt <- pairwise.wilcox.test(data2$Wert, data2$Typ, p.adjust.method="none")$p.value
> pwt
X1.7x.Neo.crypto.con. X1.7x.Neo.crypto.pro. X10..ETOH.novib
X1.7x.Neo.crypto.pro. 3.084685e-01 NA NA
X10..ETOH.novib 1.748184e-07 7.305126e-07 NA
X10..EtOH.vib 7.401207e-01 2.536237e-01 2.677306e-06
> print("Holm:")
[1] "Holm:"
> pwt <- pairwise.wilcox.test(data2$Wert, data2$Typ, p.adjust.method="holm")$p.value
> pwt
X1.7x.Neo.crypto.con. X1.7x.Neo.crypto.pro. X10..ETOH.novib
X1.7x.Neo.crypto.pro. 7.608712e-01 NA NA
X10..ETOH.novib 1.048910e-06 3.652563e-06 NA
X10..EtOH.vib 7.608712e-01 7.608712e-01 1.070923e-05
