# Supplementary material for: Chlorogenic Acids, Acting via Calcineurin, Are the Main Compounds in Centella asiatica Extracts That Mediate Resilience to Chronic Stress in Drosophila melanogaster
Source: Nutrients. 2023 Sep 16;15(18):4016. doi: 10.3390/nu15184016 (PMC10537055; doi:10.3390/nu15184016)
Supplement: Supplementary file 1 [file nutrients-15-04016-s001.zip › Statistics_Figure7.xlsx]

## Sheet: Statistics_Fig7B
> args <- commandArgs(TRUE)
> options(warn=-1)
> data <- read.csv2(file.choose())
> cn<-colnames(data)
> min1<-min(data [,1][!is.na(data [,1])])
> min2<-min(data [,2][!is.na(data [,2])])
> min3<-min(data [,3][!is.na(data [,3])])
> min4<-min(data [,4][!is.na(data [,4])])
> min5<-min(data [,5][!is.na(data [,5])])
> min6<-min(data [,6][!is.na(data [,6])])
> miny=min(min1,min2,min3,min4,min5,min6)
> max1<-max(data [,1][!is.na(data [,1])])
> max2<-max(data [,2][!is.na(data [,2])])
> max3<-max(data [,3][!is.na(data [,3])])
> max4<-max(data [,4][!is.na(data [,4])])
> max5<-max(data [,5][!is.na(data [,5])])
> max6<-max(data [,6][!is.na(data [,6])])
> maxy=max(max1,max2,max3,max4,max5,max6)
> deltay<-(maxy-miny)
> print("Shapiro-Wilk-Test:")
[1] "Shapiro-Wilk-Test:"
> ps_1 <- shapiro.test(data [,1])$p.value
> ps_1
[1] 0.0001597711
> ps_2 <- shapiro.test(data [,2])$p.value
> ps_2
[1] 0.2206201
> ps_3 <- shapiro.test(data [,3])$p.value
> ps_3
[1] 0.00113036
> ps_4 <- shapiro.test(data [,4])$p.value
> ps_4
[1] 0.2902752
> ps_5 <- shapiro.test(data [,5])$p.value
> ps_5
[1] 5.855545e-05
> ps_6 <- shapiro.test(data [,6])$p.value
> ps_6
[1] 0.02516376
> data2 <- tidyr::gather(data,"Typ","Wert",na.rm=TRUE)
> kruskal.test(data2$Wert, data2$Typ)
Kruskal-Wallis rank sum test
data: data2$Wert and data2$Typ
Kruskal-Wallis chi-squared = 27.323, df = 5, p-value = 4.934e-05
> print("none")
[1] "none"
> pwt <- pairwise.wilcox.test(data2$Wert, data2$Typ, p.adjust.method="none")$p.value
> pwt
X1.45xchloro.cont..PT X1.45xchloro.cont..T1 X1.45xchloro.pro..PT X1.45xchloro.pro..T1 X10..EtOH.PT
X1.45xchloro.cont..T1 0.056289567 NA NA NA NA
X1.45xchloro.pro..PT 0.418249614 0.02237583 NA NA NA
X1.45xchloro.pro..T1 0.018607037 0.53123827 0.0076668357 NA NA
X10..EtOH.PT 0.543945909 0.03153446 0.9302779551 0.008589382 NA
X10..EtOH.T1 0.000441011 0.02139485 0.0002876881 0.097633791 0.0003553821
> print("Holm:")
[1] "Holm:"
> pwt <- pairwise.wilcox.test(data2$Wert, data2$Typ, p.adjust.method="holm")$p.value
> pwt
X1.45xchloro.cont..PT X1.45xchloro.cont..T1 X1.45xchloro.pro..PT X1.45xchloro.pro..T1 X10..EtOH.PT
X1.45xchloro.cont..T1 0.337737404 NA NA NA NA
X1.45xchloro.pro..PT 1.000000000 0.1925536 NA NA NA
X1.45xchloro.pro..T1 0.186070367 1.0000000 0.092002029 NA NA
X10..EtOH.PT 1.000000000 0.2207413 1.000000000 0.09448321 NA
X10..EtOH.T1 0.005733142 0.1925536 0.004315322 0.48816895 0.004975349

## Sheet: Statistics_Fig7C
> args <- commandArgs(TRUE)
> options(warn=-1)
> data <- read.csv2(file.choose())
> cn<-colnames(data)
> min1<-min(data [,1][!is.na(data [,1])])
> min2<-min(data [,2][!is.na(data [,2])])
> min3<-min(data [,3][!is.na(data [,3])])
> min4<-min(data [,4][!is.na(data [,4])])
> miny=min(min1,min2,min3,min4)
> max1<-max(data [,1][!is.na(data [,1])])
> max2<-max(data [,2][!is.na(data [,2])])
> max3<-max(data [,3][!is.na(data [,3])])
> max4<-max(data [,4][!is.na(data [,4])])
> maxy=max(max1,max2,max3,max4)
> deltay<-(maxy-miny)
> print("Shapiro-Wilk-Test:")
[1] "Shapiro-Wilk-Test:"
> ps_1 <- shapiro.test(data [,1])$p.value
> ps_1
[1] 0.008548551
> ps_2 <- shapiro.test(data [,2])$p.value
> ps_2
[1] 0.005135633
> ps_3 <- shapiro.test(data [,3])$p.value
> ps_3
[1] 0.4783968
> ps_4 <- shapiro.test(data [,4])$p.value
> ps_4
[1] 0.01632115
> data2 <- tidyr::gather(data,"Typ","Wert",na.rm=TRUE)
> kruskal.test(data2$Wert, data2$Typ)
Kruskal-Wallis rank sum test
data: data2$Wert and data2$Typ
Kruskal-Wallis chi-squared = 30.125, df = 3, p-value = 1.299e-06
> print("none")
[1] "none"
> pwt <- pairwise.wilcox.test(data2$Wert, data2$Typ, p.adjust.method="none")$p.value
> pwt
X1.45x.chloro.con. X1.45x.chloro.pro. X10..ETOH.novib
X1.45x.chloro.pro. 5.781931e-01 NA NA
X10..ETOH.novib 8.652842e-05 5.146236e-05 NA
X10..EtOH.vib 6.036117e-02 9.660477e-02 2.677306e-06
> print("Holm:")
[1] "Holm:"
> pwt <- pairwise.wilcox.test(data2$Wert, data2$Typ, p.adjust.method="holm")$p.value
> pwt
X1.45x.chloro.con. X1.45x.chloro.pro. X10..ETOH.novib
X1.45x.chloro.pro. 0.5781930890 NA NA
X10..ETOH.novib 0.0003461137 0.0002573118 NA
X10..EtOH.vib 0.1810834985 0.1932095410 1.606384e-05

## Sheet: Statistics_Fig7D
> args <- commandArgs(TRUE)
> options(warn=-1)
> data <- read.csv2(file.choose())
> cn<-colnames(data)
> min1<-min(data [,1][!is.na(data [,1])])
> min2<-min(data [,2][!is.na(data [,2])])
> min3<-min(data [,3][!is.na(data [,3])])
> min4<-min(data [,4][!is.na(data [,4])])
> min5<-min(data [,5][!is.na(data [,5])])
> min6<-min(data [,6][!is.na(data [,6])])
> miny=min(min1,min2,min3,min4,min5,min6)
> max1<-max(data [,1][!is.na(data [,1])])
> max2<-max(data [,2][!is.na(data [,2])])
> max3<-max(data [,3][!is.na(data [,3])])
> max4<-max(data [,4][!is.na(data [,4])])
> max5<-max(data [,5][!is.na(data [,5])])
> max6<-max(data [,6][!is.na(data [,6])])
> maxy=max(max1,max2,max3,max4,max5,max6)
> deltay<-(maxy-miny)
> print("Shapiro-Wilk-Test:")
[1] "Shapiro-Wilk-Test:"
> ps_1 <- shapiro.test(data [,1])$p.value
> ps_1
[1] 3.207419e-06
> ps_2 <- shapiro.test(data [,2])$p.value
> ps_2
[1] 0.00337104
> ps_3 <- shapiro.test(data [,3])$p.value
> ps_3
[1] 9.761758e-05
> ps_4 <- shapiro.test(data [,4])$p.value
> ps_4
[1] 0.01323019
> ps_5 <- shapiro.test(data [,5])$p.value
> ps_5
[1] 0.0001207269
> ps_6 <- shapiro.test(data [,6])$p.value
> ps_6
[1] 0.2709551
> data2 <- tidyr::gather(data,"Typ","Wert",na.rm=TRUE)
> kruskal.test(data2$Wert, data2$Typ)
Kruskal-Wallis rank sum test
data: data2$Wert and data2$Typ
Kruskal-Wallis chi-squared = 37.61, df = 5, p-value = 4.518e-07
> print("none")
[1] "none"
> pwt <- pairwise.wilcox.test(data2$Wert, data2$Typ, p.adjust.method="none")$p.value
> pwt
Chloro.3x.cont..PT Chloro.3x.cont..T1 Chloro.3x.pro..PT Chloro.3x.pro..T1 X10..EtOH.PT
Chloro.3x.cont..T1 3.033013e-01 NA NA NA NA
Chloro.3x.pro..PT 4.294509e-01 0.119127920 NA NA NA
Chloro.3x.pro..T1 1.564853e-02 0.457181831 3.314787e-02 NA NA
X10..EtOH.PT 5.171570e-01 0.163316339 8.099225e-01 0.003030022 NA
X10..EtOH.T1 8.633334e-06 0.004826618 2.889359e-06 0.005349705 1.906504e-06
> print("Holm:")
[1] "Holm:"
> pwt <- pairwise.wilcox.test(data2$Wert, data2$Typ, p.adjust.method="holm")$p.value
> pwt
Chloro.3x.cont..PT Chloro.3x.cont..T1 Chloro.3x.pro..PT Chloro.3x.pro..T1 X10..EtOH.PT
Chloro.3x.cont..T1 1.0000000000 NA NA NA NA
Chloro.3x.pro..PT 1.0000000000 0.83389544 NA NA NA
Chloro.3x.pro..T1 0.1251882309 1.00000000 3.646266e-01 NA NA
X10..EtOH.PT 1.0000000000 0.97989803 1.000000e+00 0.03636026 NA
X10..EtOH.T1 0.0001122333 0.04826618 4.045103e-05 0.04826618 2.859756e-05

## Sheet: Statistics_Fig7E
> args <- commandArgs(TRUE)
> options(warn=-1)
> data <- read.csv2(file.choose())
> cn<-colnames(data)
> min1<-min(data [,1][!is.na(data [,1])])
> min2<-min(data [,2][!is.na(data [,2])])
> min3<-min(data [,3][!is.na(data [,3])])
> min4<-min(data [,4][!is.na(data [,4])])
> miny=min(min1,min2,min3,min4)
> max1<-max(data [,1][!is.na(data [,1])])
> max2<-max(data [,2][!is.na(data [,2])])
> max3<-max(data [,3][!is.na(data [,3])])
> max4<-max(data [,4][!is.na(data [,4])])
> maxy=max(max1,max2,max3,max4)
> deltay<-(maxy-miny)
> print("Shapiro-Wilk-Test:")
[1] "Shapiro-Wilk-Test:"
> ps_1 <- shapiro.test(data [,1])$p.value
> ps_1
[1] 0.2203068
> ps_2 <- shapiro.test(data [,2])$p.value
> ps_2
[1] 0.06551484
> ps_3 <- shapiro.test(data [,3])$p.value
> ps_3
[1] 0.4828396
> ps_4 <- shapiro.test(data [,4])$p.value
> ps_4
[1] 0.1875769
> data2 <- tidyr::gather(data,"Typ","Wert",na.rm=TRUE)
> kruskal.test(data2$Wert, data2$Typ)
Kruskal-Wallis rank sum test
data: data2$Wert and data2$Typ
Kruskal-Wallis chi-squared = 17.624, df = 3, p-value = 0.0005259
> print("none")
[1] "none"
> pwt <- pairwise.wilcox.test(data2$Wert, data2$Typ, p.adjust.method="none")$p.value
> pwt
Chloro.3x.cont. Chloro.3x.pro. X10..ETOH.novib
Chloro.3x.pro. 0.614072047 NA NA
X10..ETOH.novib 0.470536080 0.218240140 NA
X10..EtOH.vib 0.001211074 0.006539229 0.0002037621
> print("Holm:")
[1] "Holm:"
> pwt <- pairwise.wilcox.test(data2$Wert, data2$Typ, p.adjust.method="holm")$p.value
> pwt
Chloro.3x.cont. Chloro.3x.pro. X10..ETOH.novib
Chloro.3x.pro. 0.941072160 NA NA
X10..ETOH.novib 0.941072160 0.65472042 NA
X10..EtOH.vib 0.006055369 0.02615692 0.001222573
