# Supplementary material for: Chlorogenic Acids, Acting via Calcineurin, Are the Main Compounds in Centella asiatica Extracts That Mediate Resilience to Chronic Stress in Drosophila melanogaster
Source: Nutrients. 2023 Sep 16;15(18):4016. doi: 10.3390/nu15184016 (PMC10537055; doi:10.3390/nu15184016)
Supplement: Supplementary file 1 [file nutrients-15-04016-s001.zip › Statistics_Figure8.xlsx]

## Sheet: Females Sleep bouts
Sleep bout #/day				Sleep bout length
Column B	Control			Column B	Control
vs.	vs.			vs.	vs.
Column A	BEN-CAW-7 10 mg/g			Column A	BEN-CAW-7 10 mg/g
Unpaired t test with Welch's correction				Unpaired t test with Welch's correction
P value	0.8792			P value	0.6871
P value summary	ns			P value summary	ns
Significantly different? (P < 0.05)	No			Significantly different? (P < 0.05)	No
One- or two-tailed P value?	Two-tailed			One- or two-tailed P value?	Two-tailed
Welch-corrected t, df	t=0.1525 df=73.65			Welch-corrected t, df	t=0.4041 df=89.21
How big is the difference?				How big is the difference?
Mean ± SEM of column A	30.44 ± 1.281, n=60			Mean ± SEM of column A	37.26 ± 3.071, n=60
Mean ± SEM of column B	30.12 ± 1.708, n=37			Mean ± SEM of column B	39.02 ± 3.086, n=37
Difference between means	-0.3257 ± 2.135			Difference between means	1.759 ± 4.354
95% confidence interval	-4.580 to 3.929			95% confidence interval	-6.892 to 10.41
R squared	0.0003158			R squared	0.001827
F test to compare variances				F test to compare variances
F,DFn, Dfd	1.097, 36, 59			F,DFn, Dfd	1.606, 59, 36
P value	0.7392			P value	0.1299
P value summary	ns			P value summary	ns
Significantly different? (P < 0.05)	No			Significantly different? (P < 0.05)	No
	BEN-CAW-7 10 mg/g	Control			BEN-CAW-7 10 mg/g	Control
Number of values	60	37		Number of values	60	37
Minimum	8.33	12.5		Minimum	12.46	16.25
25% Percentile	23.87	22.66		25% Percentile	22.15	25.36
Median	30.08	31.16		Median	33.49	36.59
75% Percentile	36.25	37.33		75% Percentile	44.32	47.82
Maximum	52.33	50.33		Maximum	164.8	95.29
Mean	30.44	30.12		Mean	37.26	39.02
Std. Deviation	9.921	10.39		Std. Deviation	23.79	18.77
Std. Error of Mean	1.281	1.708		Std. Error of Mean	3.071	3.086
Lower 95% CI	27.88	26.65		Lower 95% CI	31.12	32.76
Upper 95% CI	33.01	33.58		Upper 95% CI	43.41	45.28

## Sheet: Males Sleep bouts
Sleep bout #/day				Sleep bout length
Column B	Control			Column B	Control
vs.	vs.			vs.	vs.
Column A	BEN-CAW-7 10 mg/g			Column A	BEN-CAW-7 10 mg/g
Unpaired t test with Welch's correction				Unpaired t test with Welch's correction
P value	0.1007			P value	0.8071
P value summary	ns			P value summary	ns
Significantly different? (P < 0.05)	No			Significantly different? (P < 0.05)	No
One- or two-tailed P value?	Two-tailed			One- or two-tailed P value?	Two-tailed
Welch-corrected t, df	t=1.659 df=89.23			Welch-corrected t, df	t=0.2450 df=77.56
How big is the difference?				How big is the difference?
Mean ± SEM of column A	28.25 ± 1.694, n=49			Mean ± SEM of column A	46.94 ± 3.680, n=49
Mean ± SEM of column B	32.40 ± 1.846, n=44			Mean ± SEM of column B	45.34 ± 5.368, n=44
Difference between means	4.156 ± 2.506			Difference between means	-1.594 ± 6.508
95% confidence interval	-0.8225 to 9.135			95% confidence interval	-14.55 to 11.36
R squared	0.02991			R squared	0.0007732
F test to compare variances				F test to compare variances
F,DFn, Dfd	1.066, 43, 48			F,DFn, Dfd	1.911, 43, 48
P value	0.826			P value	0.0301
P value summary	ns			P value summary	*
Significantly different? (P < 0.05)	No			Significantly different? (P < 0.05)	Yes
	BEN-CAW-7 10 mg/g	Control			BEN-CAW-7 10 mg/g	Control
Number of values	49	44		Number of values	49	44
Minimum	8	6.17		Minimum	12.5	15.57
25% Percentile	20	24.83		25% Percentile	32.94	26.75
Median	27.83	34.33		Median	40.3	34.06
75% Percentile	34.08	39.96		75% Percentile	57.64	47.02
Maximum	65.49	60.33		Maximum	164.2	212.3
Mean	28.25	32.4		Mean	46.94	45.34
Std. Deviation	11.86	12.25		Std. Deviation	25.76	35.61
Std. Error of Mean	1.694	1.846		Std. Error of Mean	3.68	5.368
Lower 95% CI	24.84	28.68		Lower 95% CI	39.54	34.52
Upper 95% CI	31.65	36.13		Upper 95% CI	54.34	56.17

## Sheet: Females Day Night Total
6 week old Females
Unpaired t test with Welch's correction	Day	Night	Total			Day		Night		Total
P value	0.9458	0.2472	0.6357			CAW	Control	CAW	Control	CAW	Control
P value summary	ns	ns	ns		Number of values	60	37
Significantly different? (P < 0.05)	No	No	No		Minimum	3.143	52.29	174	457.3	181	570.7
One- or two-tailed P value?	Two-tailed	Two-tailed	Two-tailed		25% Percentile	223.6	241.5	553.5	583.7	744.7	873.8
Welch-corrected t, df	t=0.06820 df=82.65	t=1.164 df=94.86	t=0.4753 df=90.45		Median	347.5	367.4	673.1	661.3	1031	992.9
					75% Percentile	561	499.1	704.6	692.4	1250	1203
How big is the difference?					Maximum	668.4	633.7	715.4	715.7	1373	1326
Mean ± SEM of column A	368.3 ± 24.52, n=60	616.6 ± 15.17, n=60	984.8 ± 37.08, n=60
Mean ± SEM of column B	370.8 ± 28.03, n=37	638.6 ± 11.39, n=37	1009 ± 36.18, n=37		Mean	368.3	370.8	616.6	638.6	984.8	1009
Difference between means	2.540 ± 37.24	22.08 ± 18.97	24.62 ± 51.81		Std. Deviation	189.9	170.5	117.5	69.27	287.2	220.1
95% confidence interval	-71.53 to 76.61	-15.57 to 59.74	-78.29 to 127.5		Std. Error of Mean	24.52	28.03	15.17	11.39	37.08	36.18
R squared	5.628e-05	0.01409	0.002492
					Lower 95% CI	319.2	314	586.2	615.6	910.6	936.1
F test to compare variances					Upper 95% CI	417.3	427.6	646.9	661.7	1059	1083
F,DFn, Dfd	1.241, 59, 36	2.877, 59, 36	1.703, 59, 36
P value	0.4918	0.001	0.089
P value summary	ns	**	ns
Significantly different? (P < 0.05)	No	Yes	No

## Sheet: Males Day Night Total
6 week old Males
Unpaired t test with Welch's correction	Day	Night	Total			Day		Night		Total
P value	0.5804	0.0036	0.2014			CAW	Control	CAW	Control	CAW	Control
P value summary	ns	**	ns		Number of values	49	44
Significantly different? (P < 0.05)	No	Yes	No		Minimum	281.7	220.7	277.9	518.7	686.3	777.1
One- or two-tailed P value?	Two-tailed	Two-tailed	Two-tailed		25% Percentile	423.4	426	543.1	587.8	972.9	1054
Welch-corrected t, df	t=0.5548 df=88.39	t=3.004 df=77.94	t=1.287 df=90.28		Median	489.6	471.6	612.9	653.9	1084	1122
					75% Percentile	567.5	558.4	677.1	689	1192	1221
How big is the difference?	Day	Night	Total		Maximum	642.7	693.4	699.9	710.7	1339	1394
Mean ± SEM of column A	487.8 ± 13.30, n=49	587.0 ± 14.56, n=49	1075 ± 23.52, n=49
Mean ± SEM of column B	476.7 ± 14.96, n=44	638.1 ± 8.812, n=44	1115 ± 20.34, n=44		Mean	487.8	476.7	587	638.1	1075	1115
Difference between means	-11.11 ± 20.02	51.12 ± 17.02	40.01 ± 31.09		Std. Deviation	93.13	99.22	101.9	58.45	164.6	134.9
95% confidence interval	-50.89 to 28.67	17.24 to 85.00	-21.76 to 101.8		Std. Error of Mean	13.3	14.96	14.56	8.812	23.52	20.34
R squared	0.00347	0.1038	0.01801
					Lower 95% CI	461.1	446.6	557.7	620.3	1028	1074
F test to compare variances	Day	Night	Total		Upper 95% CI	514.6	506.9	616.2	655.9	1122	1156
F,DFn, Dfd	1.135, 43, 48	3.040, 48, 43	1.489, 48, 43
P value	0.6673	0.0003	0.1873
P value summary	ns	***	ns
Significantly different? (P < 0.05)	No	Yes	No
