# Supplementary material for: Chlorogenic Acids, Acting via Calcineurin, Are the Main Compounds in Centella asiatica Extracts That Mediate Resilience to Chronic Stress in Drosophila melanogaster
Source: Nutrients. 2023 Sep 16;15(18):4016. doi: 10.3390/nu15184016 (PMC10537055; doi:10.3390/nu15184016)
Supplement: Supplementary file 1 [file nutrients-15-04016-s001.zip › Statistics_Figure9.xlsx]

## Sheet: Statistics_Fig9B_GAL4ctrl
> args <- commandArgs(TRUE)
> options(warn=-1)
> data <- read.csv2(file.choose())
> cn<-colnames(data)
> min1<-min(data [,1][!is.na(data [,1])])
> min2<-min(data [,2][!is.na(data [,2])])
> min3<-min(data [,3][!is.na(data [,3])])
> min4<-min(data [,4][!is.na(data [,4])])
> miny=min(min1,min2,min3,min4)
> max1<-max(data [,1][!is.na(data [,1])])
> max2<-max(data [,2][!is.na(data [,2])])
> max3<-max(data [,3][!is.na(data [,3])])
> max4<-max(data [,4][!is.na(data [,4])])
> maxy=max(max1,max2,max3,max4)
> deltay<-(maxy-miny)
> print("Shapiro-Wilk-Test:")
[1] "Shapiro-Wilk-Test:"
> ps_1 <- shapiro.test(data [,1])$p.value
> ps_1
[1] 0.0004890753
> ps_2 <- shapiro.test(data [,2])$p.value
> ps_2
[1] 0.04638376
> ps_3 <- shapiro.test(data [,3])$p.value
> ps_3
[1] 0.0002435391
> ps_4 <- shapiro.test(data [,4])$p.value
> ps_4
[1] 0.02597114
> data2 <- tidyr::gather(data,"Typ","Wert",na.rm=TRUE)
> kruskal.test(data2$Wert, data2$Typ)
Kruskal-Wallis rank sum test
data: data2$Wert and data2$Typ
Kruskal-Wallis chi-squared = 11.11, df = 3, p-value = 0.01115
> print("none")
[1] "none"
> pwt <- pairwise.wilcox.test(data2$Wert, data2$Typ, p.adjust.method="none")$p.value
> pwt
c739GAL4...chloro.PT c739GAL4...chloro.T1 c739GAL4...ctrl.PT
c739GAL4...chloro.T1 0.463575898 NA NA
c739GAL4...ctrl.PT 0.892553331 0.40931354 NA
c739GAL4...ctrl.T1 0.003694489 0.05462747 0.003280024
> print("Holm:")
[1] "Holm:"
> pwt <- pairwise.wilcox.test(data2$Wert, data2$Typ, p.adjust.method="holm")$p.value
> pwt
c739GAL4...chloro.PT c739GAL4...chloro.T1 c739GAL4...ctrl.PT
c739GAL4...chloro.T1 1.00000000 NA NA
c739GAL4...ctrl.PT 1.00000000 1.0000000 NA
c739GAL4...ctrl.T1 0.01968015 0.2185099 0.01968015

## Sheet: Statistics_Fig9B_UASctrl
> args <- commandArgs(TRUE)
> options(warn=-1)
> data <- read.csv2(file.choose())
> cn<-colnames(data)
> min1<-min(data [,1][!is.na(data [,1])])
> min2<-min(data [,2][!is.na(data [,2])])
> min3<-min(data [,3][!is.na(data [,3])])
> min4<-min(data [,4][!is.na(data [,4])])
> miny=min(min1,min2,min3,min4)
> max1<-max(data [,1][!is.na(data [,1])])
> max2<-max(data [,2][!is.na(data [,2])])
> max3<-max(data [,3][!is.na(data [,3])])
> max4<-max(data [,4][!is.na(data [,4])])
> maxy=max(max1,max2,max3,max4)
> deltay<-(maxy-miny)
> print("Shapiro-Wilk-Test:")
[1] "Shapiro-Wilk-Test:"
> ps_1 <- shapiro.test(data [,1])$p.value
> ps_1
[1] 0.00161123
> ps_2 <- shapiro.test(data [,2])$p.value
> ps_2
[1] 0.02422161
> ps_3 <- shapiro.test(data [,3])$p.value
> ps_3
[1] 3.000556e-05
> ps_4 <- shapiro.test(data [,4])$p.value
> ps_4
[1] 0.01411352
> data2 <- tidyr::gather(data,"Typ","Wert",na.rm=TRUE)
> kruskal.test(data2$Wert, data2$Typ)
Kruskal-Wallis rank sum test
data: data2$Wert and data2$Typ
Kruskal-Wallis chi-squared = 6.694, df = 3, p-value = 0.08232
> print("none")
[1] "none"
> pwt <- pairwise.wilcox.test(data2$Wert, data2$Typ, p.adjust.method="none")$p.value
> pwt
CalcinRNAi...chloro.PT CalcinRNAi...chloro.T1 CalcinRNAi...ctrl.PT
CalcinRNAi...chloro.T1 0.1604337 NA NA
CalcinRNAi...ctrl.PT 0.2758569 0.05583764 NA
CalcinRNAi...ctrl.T1 0.1510090 0.91760023 0.03620677
> print("Holm:")
[1] "Holm:"
> pwt <- pairwise.wilcox.test(data2$Wert, data2$Typ, p.adjust.method="holm")$p.value
> pwt
CalcinRNAi...chloro.PT CalcinRNAi...chloro.T1 CalcinRNAi...ctrl.PT
CalcinRNAi...chloro.T1 0.6040362 NA NA
CalcinRNAi...ctrl.PT 0.6040362 0.2791882 NA
CalcinRNAi...ctrl.T1 0.6040362 0.9176002 0.2172406

## Sheet: Statistics_Fig9B_Testgr
> args <- commandArgs(TRUE)
> options(warn=-1)
> data <- read.csv2(file.choose())
> cn<-colnames(data)
> min1<-min(data [,1][!is.na(data [,1])])
> min2<-min(data [,2][!is.na(data [,2])])
> min3<-min(data [,3][!is.na(data [,3])])
> min4<-min(data [,4][!is.na(data [,4])])
> miny=min(min1,min2,min3,min4)
> max1<-max(data [,1][!is.na(data [,1])])
> max2<-max(data [,2][!is.na(data [,2])])
> max3<-max(data [,3][!is.na(data [,3])])
> max4<-max(data [,4][!is.na(data [,4])])
> maxy=max(max1,max2,max3,max4)
> deltay<-(maxy-miny)
> print("Shapiro-Wilk-Test:")
[1] "Shapiro-Wilk-Test:"
> ps_1 <- shapiro.test(data [,1])$p.value
> ps_1
[1] 0.02469631
> ps_2 <- shapiro.test(data [,2])$p.value
> ps_2
[1] 0.1539833
> ps_3 <- shapiro.test(data [,3])$p.value
> ps_3
[1] 0.003173313
> ps_4 <- shapiro.test(data [,4])$p.value
> ps_4
[1] 0.1442723
> data2 <- tidyr::gather(data,"Typ","Wert",na.rm=TRUE)
> kruskal.test(data2$Wert, data2$Typ)
Kruskal-Wallis rank sum test
data: data2$Wert and data2$Typ
Kruskal-Wallis chi-squared = 38.016, df = 3, p-value = 2.804e-08
> print("none")
[1] "none"
> pwt <- pairwise.wilcox.test(data2$Wert, data2$Typ, p.adjust.method="none")$p.value
> pwt
c739.CalcinRNAi.chloro.PT c739.CalcinRNAi.chloro.T1 c739.CalcinRNAi.ctrl.PT
c739.CalcinRNAi.chloro.T1 9.116618e-05 NA NA
c739.CalcinRNAi.ctrl.PT 5.471312e-01 4.920219e-05 NA
c739.CalcinRNAi.ctrl.T1 3.728833e-06 8.328422e-01 3.350084e-06
> print("Holm:")
[1] "Holm:"
> pwt <- pairwise.wilcox.test(data2$Wert, data2$Typ, p.adjust.method="holm")$p.value
> pwt
c739.CalcinRNAi.chloro.PT c739.CalcinRNAi.chloro.T1 c739.CalcinRNAi.ctrl.PT
c739.CalcinRNAi.chloro.T1 2.734985e-04 NA NA
c739.CalcinRNAi.ctrl.PT 1.000000e+00 0.0001968088 NA
c739.CalcinRNAi.ctrl.T1 2.010051e-05 1.0000000000 2.010051e-05

## Sheet: Statistics_Fig9C
> args <- commandArgs(TRUE)
> options(warn=-1)
> data <- read.csv2(file.choose())
> cn<-colnames(data)
> min1<-min(data [,1][!is.na(data [,1])])
> min2<-min(data [,2][!is.na(data [,2])])
> min3<-min(data [,3][!is.na(data [,3])])
> min4<-min(data [,4][!is.na(data [,4])])
> min5<-min(data [,5][!is.na(data [,5])])
> min6<-min(data [,6][!is.na(data [,6])])
> miny=min(min1,min2,min3,min4,min5,min6)
> max1<-max(data [,1][!is.na(data [,1])])
> max2<-max(data [,2][!is.na(data [,2])])
> max3<-max(data [,3][!is.na(data [,3])])
> max4<-max(data [,4][!is.na(data [,4])])
> max5<-max(data [,5][!is.na(data [,5])])
> max6<-max(data [,6][!is.na(data [,6])])
> maxy=max(max1,max2,max3,max4,max5,max6)
> deltay<-(maxy-miny)
> print("Shapiro-Wilk-Test:")
[1] "Shapiro-Wilk-Test:"
> ps_1 <- shapiro.test(data [,1])$p.value
> ps_1
[1] 0.6737411
> ps_2 <- shapiro.test(data [,2])$p.value
> ps_2
[1] 0.1271793
> ps_3 <- shapiro.test(data [,3])$p.value
> ps_3
[1] 0.4188053
> ps_4 <- shapiro.test(data [,4])$p.value
> ps_4
[1] 0.142526
> ps_5 <- shapiro.test(data [,5])$p.value
> ps_5
[1] 0.0677291
> ps_6 <- shapiro.test(data [,6])$p.value
> ps_6
[1] 0.002787833
> data2 <- tidyr::gather(data,"Typ","Wert",na.rm=TRUE)
> kruskal.test(data2$Wert, data2$Typ)
Kruskal-Wallis rank sum test
data: data2$Wert and data2$Typ
Kruskal-Wallis chi-squared = 50.817, df = 5, p-value = 9.429e-10
> print("none")
[1] "none"
> pwt <- pairwise.wilcox.test(data2$Wert, data2$Typ, p.adjust.method="none")$p.value
> pwt
c739...chloro c739...ctrl c739.CalcinRNAi.chloro c739.CalcinRNAi.ctrl calcinRNAi...chloro
c739...ctrl 8.537910e-01 NA NA NA NA
c739.CalcinRNAi.chloro 6.413010e-06 4.191084e-06 NA NA NA
c739.CalcinRNAi.ctrl 2.466948e-04 2.366874e-04 6.266494e-02 NA NA
calcinRNAi...chloro 6.223917e-02 1.421994e-01 7.563883e-07 0.0002114285 NA
calcinRNAi...ctrl 1.924239e-01 3.383230e-01 4.210011e-06 0.0005016494 0.582668
> print("Holm:")
[1] "Holm:"
> pwt <- pairwise.wilcox.test(data2$Wert, data2$Typ, p.adjust.method="holm")$p.value
> pwt
c739...chloro c739...ctrl c739.CalcinRNAi.chloro c739.CalcinRNAi.ctrl calcinRNAi...chloro
c739...ctrl 1.000000e+00 NA NA NA NA
c739.CalcinRNAi.chloro 7.695612e-05 5.867518e-05 NA NA NA
c739.CalcinRNAi.ctrl 2.366874e-03 2.366874e-03 4.356742e-01 NA NA
calcinRNAi...chloro 4.356742e-01 7.109972e-01 1.134582e-05 0.002325713 NA
calcinRNAi...ctrl 7.696955e-01 1.000000e+00 5.867518e-05 0.004013195 1
