# Supplementary material for: Chlorogenic Acids, Acting via Calcineurin, Are the Main Compounds in Centella asiatica Extracts That Mediate Resilience to Chronic Stress in Drosophila melanogaster
Source: Nutrients. 2023 Sep 16;15(18):4016. doi: 10.3390/nu15184016 (PMC10537055; doi:10.3390/nu15184016)
Supplement: Supplementary file 1 [file nutrients-15-04016-s001.zip › Statistics_FigureS1.xlsx]

## Sheet: Statistics_FigS7B
> args <- commandArgs(TRUE)
> options(warn=-1)
> data <- read.csv2(file.choose())
> cn<-colnames(data)
> min1<-min(data [,1][!is.na(data [,1])])
> min2<-min(data [,2][!is.na(data [,2])])
> min3<-min(data [,3][!is.na(data [,3])])
> min4<-min(data [,4][!is.na(data [,4])])
> min5<-min(data [,5][!is.na(data [,5])])
> min6<-min(data [,6][!is.na(data [,6])])
> miny=min(min1,min2,min3,min4,min5,min6)
> max1<-max(data [,1][!is.na(data [,1])])
> max2<-max(data [,2][!is.na(data [,2])])
> max3<-max(data [,3][!is.na(data [,3])])
> max4<-max(data [,4][!is.na(data [,4])])
> max5<-max(data [,5][!is.na(data [,5])])
> max6<-max(data [,6][!is.na(data [,6])])
> maxy=max(max1,max2,max3,max4,max5,max6)
> deltay<-(maxy-miny)
> print("Shapiro-Wilk-Test:")
[1] "Shapiro-Wilk-Test:"
> ps_1 <- shapiro.test(data [,1])$p.value
> ps_1
[1] 0.0007549446
> ps_2 <- shapiro.test(data [,2])$p.value
> ps_2
[1] 0.03566782
> ps_3 <- shapiro.test(data [,3])$p.value
> ps_3
[1] 0.0005064274
> ps_4 <- shapiro.test(data [,4])$p.value
> ps_4
[1] 0.02433742
> ps_5 <- shapiro.test(data [,5])$p.value
> ps_5
[1] 3.401796e-05
> ps_6 <- shapiro.test(data [,6])$p.value
> ps_6
[1] 0.1804411
> data2 <- tidyr::gather(data,"Typ","Wert",na.rm=TRUE)
> kruskal.test(data2$Wert, data2$Typ)
Kruskal-Wallis rank sum test
data: data2$Wert and data2$Typ
Kruskal-Wallis chi-squared = 69.932, df = 5, p-value = 1.059e-13
> print("none")
[1] "none"
> pwt <- pairwise.wilcox.test(data2$Wert, data2$Typ, p.adjust.method="none")$p.value
> pwt
Neo.cont..PT Neo.cont..T1 Neo.pro..PT Neo.pro..T1 X10..EtOH.PT
Neo.cont..T1 4.141956e-06 NA NA NA NA
Neo.pro..PT 8.055119e-01 4.984296e-06 NA NA NA
Neo.pro..T1 9.915850e-07 6.965197e-01 1.230913e-06 NA NA
X10..EtOH.PT 9.317663e-01 8.171816e-06 8.670636e-01 1.851054e-06 NA
X10..EtOH.T1 4.663166e-07 7.983703e-01 6.626921e-07 8.824768e-01 9.828634e-07
> print("Holm:")
[1] "Holm:"
> pwt <- pairwise.wilcox.test(data2$Wert, data2$Typ, p.adjust.method="holm")$p.value
> pwt
Neo.cont..PT Neo.cont..T1 Neo.pro..PT Neo.pro..T1 X10..EtOH.PT
Neo.cont..T1 3.727760e-05 NA NA NA NA
Neo.pro..PT 1.000000e+00 3.987437e-05 NA NA NA
Neo.pro..T1 1.277722e-05 1.000000e+00 1.354004e-05 NA NA
X10..EtOH.PT 1.000000e+00 5.720271e-05 1.000000e+00 1.851054e-05 NA
X10..EtOH.T1 6.994749e-06 1.000000e+00 9.277690e-06 1.000000e+00 1.277722e-05

## Sheet: Statistics_FigS7C
> args <- commandArgs(TRUE)
> options(warn=-1)
> data <- read.csv2(file.choose())
> cn<-colnames(data)
> min1<-min(data [,1][!is.na(data [,1])])
> min2<-min(data [,2][!is.na(data [,2])])
> min3<-min(data [,3][!is.na(data [,3])])
> min4<-min(data [,4][!is.na(data [,4])])
> miny=min(min1,min2,min3,min4)
> max1<-max(data [,1][!is.na(data [,1])])
> max2<-max(data [,2][!is.na(data [,2])])
> max3<-max(data [,3][!is.na(data [,3])])
> max4<-max(data [,4][!is.na(data [,4])])
> maxy=max(max1,max2,max3,max4)
> deltay<-(maxy-miny)
> print("Shapiro-Wilk-Test:")
[1] "Shapiro-Wilk-Test:"
> ps_1 <- shapiro.test(data [,1])$p.value
> ps_1
[1] 0.2203068
> ps_2 <- shapiro.test(data [,2])$p.value
> ps_2
[1] 0.3772268
> ps_3 <- shapiro.test(data [,3])$p.value
> ps_3
[1] 0.07552842
> ps_4 <- shapiro.test(data [,4])$p.value
> ps_4
[1] 0.05387481
> data2 <- tidyr::gather(data,"Typ","Wert",na.rm=TRUE)
> kruskal.test(data2$Wert, data2$Typ)
Kruskal-Wallis rank sum test
data: data2$Wert and data2$Typ
Kruskal-Wallis chi-squared = 18.658, df = 3, p-value = 0.0003217
> print("none")
[1] "none"
> pwt <- pairwise.wilcox.test(data2$Wert, data2$Typ, p.adjust.method="none")$p.value
> pwt
Neo.cont. Neo.pro. X10..ETOH.novib
Neo.pro. 0.8529376174 NA NA
X10..ETOH.novib 0.0002400159 0.001857208 NA
X10..EtOH.vib 0.8816945248 0.797347751 0.0002891902
> print("Holm:")
[1] "Holm:"
> pwt <- pairwise.wilcox.test(data2$Wert, data2$Typ, p.adjust.method="holm")$p.value
> pwt
Neo.cont. Neo.pro. X10..ETOH.novib
Neo.pro. 1.000000000 NA NA
X10..ETOH.novib 0.001440095 0.007428833 NA
X10..EtOH.vib 1.000000000 1.000000000 0.001445951

## Sheet: Statistics_FigS7D
> args <- commandArgs(TRUE)
> options(warn=-1)
> data <- read.csv2(file.choose())
> cn<-colnames(data)
> min1<-min(data [,1][!is.na(data [,1])])
> min2<-min(data [,2][!is.na(data [,2])])
> min3<-min(data [,3][!is.na(data [,3])])
> min4<-min(data [,4][!is.na(data [,4])])
> min5<-min(data [,5][!is.na(data [,5])])
> min6<-min(data [,6][!is.na(data [,6])])
> miny=min(min1,min2,min3,min4,min5,min6)
> max1<-max(data [,1][!is.na(data [,1])])
> max2<-max(data [,2][!is.na(data [,2])])
> max3<-max(data [,3][!is.na(data [,3])])
> max4<-max(data [,4][!is.na(data [,4])])
> max5<-max(data [,5][!is.na(data [,5])])
> max6<-max(data [,6][!is.na(data [,6])])
> maxy=max(max1,max2,max3,max4,max5,max6)
> deltay<-(maxy-miny)
> print("Shapiro-Wilk-Test:")
[1] "Shapiro-Wilk-Test:"
> ps_1 <- shapiro.test(data [,1])$p.value
> ps_1
[1] 3.207419e-06
> ps_2 <- shapiro.test(data [,2])$p.value
> ps_2
[1] 0.03681805
> ps_3 <- shapiro.test(data [,3])$p.value
> ps_3
[1] 7.386869e-06
> ps_4 <- shapiro.test(data [,4])$p.value
> ps_4
[1] 0.0230153
> ps_5 <- shapiro.test(data [,5])$p.value
> ps_5
[1] 0.0004971295
> ps_6 <- shapiro.test(data [,6])$p.value
> ps_6
[1] 0.01053713
> data2 <- tidyr::gather(data,"Typ","Wert",na.rm=TRUE)
> kruskal.test(data2$Wert, data2$Typ)
Kruskal-Wallis rank sum test
data: data2$Wert and data2$Typ
Kruskal-Wallis chi-squared = 80.88, df = 5, p-value = 5.492e-16
> print("none")
[1] "none"
> pwt <- pairwise.wilcox.test(data2$Wert, data2$Typ, p.adjust.method="none")$p.value
> pwt
Crypto.con..PT Crypto.con..T1 Crypto.pro..PT Crypto.pro..T1 X10..EtOH.PT
Crypto.con..T1 1.066584e-07 NA NA NA NA
Crypto.pro..PT 3.177602e-01 9.843534e-08 NA NA NA
Crypto.pro..T1 2.092401e-07 5.399441e-01 2.195206e-07 NA NA
X10..EtOH.PT 8.952356e-01 4.948623e-08 2.906890e-01 9.107193e-08 NA
X10..EtOH.T1 2.685339e-06 2.025522e-01 4.956472e-06 4.847974e-01 1.209734e-06
> print("Holm:")
[1] "Holm:"
> pwt <- pairwise.wilcox.test(data2$Wert, data2$Typ, p.adjust.method="holm")$p.value
> pwt
Crypto.con..PT Crypto.con..T1 Crypto.pro..PT Crypto.pro..T1 X10..EtOH.PT
Crypto.con..T1 1.279900e-06 NA NA NA NA
Crypto.pro..PT 1.000000e+00 1.279659e-06 NA NA NA
Crypto.pro..T1 2.301641e-06 1.000000e+00 2.301641e-06 NA NA
X10..EtOH.PT 1.000000e+00 7.422934e-07 1.000000e+00 1.275007e-06 NA
X10..EtOH.T1 2.148271e-05 1.000000e+00 3.469530e-05 1.000000e+00 1.08876e-05

## Sheet: Statistics_FigS7E
> args <- commandArgs(TRUE)
> options(warn=-1)
> data <- read.csv2(file.choose())
> cn<-colnames(data)
> min1<-min(data [,1][!is.na(data [,1])])
> min2<-min(data [,2][!is.na(data [,2])])
> min3<-min(data [,3][!is.na(data [,3])])
> min4<-min(data [,4][!is.na(data [,4])])
> miny=min(min1,min2,min3,min4)
> max1<-max(data [,1][!is.na(data [,1])])
> max2<-max(data [,2][!is.na(data [,2])])
> max3<-max(data [,3][!is.na(data [,3])])
> max4<-max(data [,4][!is.na(data [,4])])
> maxy=max(max1,max2,max3,max4)
> deltay<-(maxy-miny)
> print("Shapiro-Wilk-Test:")
[1] "Shapiro-Wilk-Test:"
> ps_1 <- shapiro.test(data [,1])$p.value
> ps_1
[1] 0.00064843
> ps_2 <- shapiro.test(data [,2])$p.value
> ps_2
[1] 0.009048904
> ps_3 <- shapiro.test(data [,3])$p.value
> ps_3
[1] 0.01570172
> ps_4 <- shapiro.test(data [,4])$p.value
> ps_4
[1] 0.02588566
> data2 <- tidyr::gather(data,"Typ","Wert",na.rm=TRUE)
> kruskal.test(data2$Wert, data2$Typ)
Kruskal-Wallis rank sum test
data: data2$Wert and data2$Typ
Kruskal-Wallis chi-squared = 18.742, df = 3, p-value = 0.0003091
> print("none")
[1] "none"
> pwt <- pairwise.wilcox.test(data2$Wert, data2$Typ, p.adjust.method="none")$p.value
> pwt
Crypto.con. Crypto.pro. X10..ETOH.novib
Crypto.pro. 0.585059647 NA NA
X10..ETOH.novib 0.002076504 0.0008975034 NA
X10..EtOH.vib 0.365288745 0.7682073352 0.0001355096
> print("Holm:")
[1] "Holm:"
> pwt <- pairwise.wilcox.test(data2$Wert, data2$Typ, p.adjust.method="holm")$p.value
> pwt
Crypto.con. Crypto.pro. X10..ETOH.novib
Crypto.pro. 1.000000000 NA NA
X10..ETOH.novib 0.008306015 0.004487517 NA
X10..EtOH.vib 1.000000000 1.000000000 0.0008130574
